# Supplementary material
Source: PubMed Central journal article supplement (PMC5129708)
Supplement: supp_pp.16.00916_PP2016-00916DR1_Supplemental_Data.pdf [file supp_pp.16.00916_PP2016-00916DR1_Supplemental_Data.pdf]

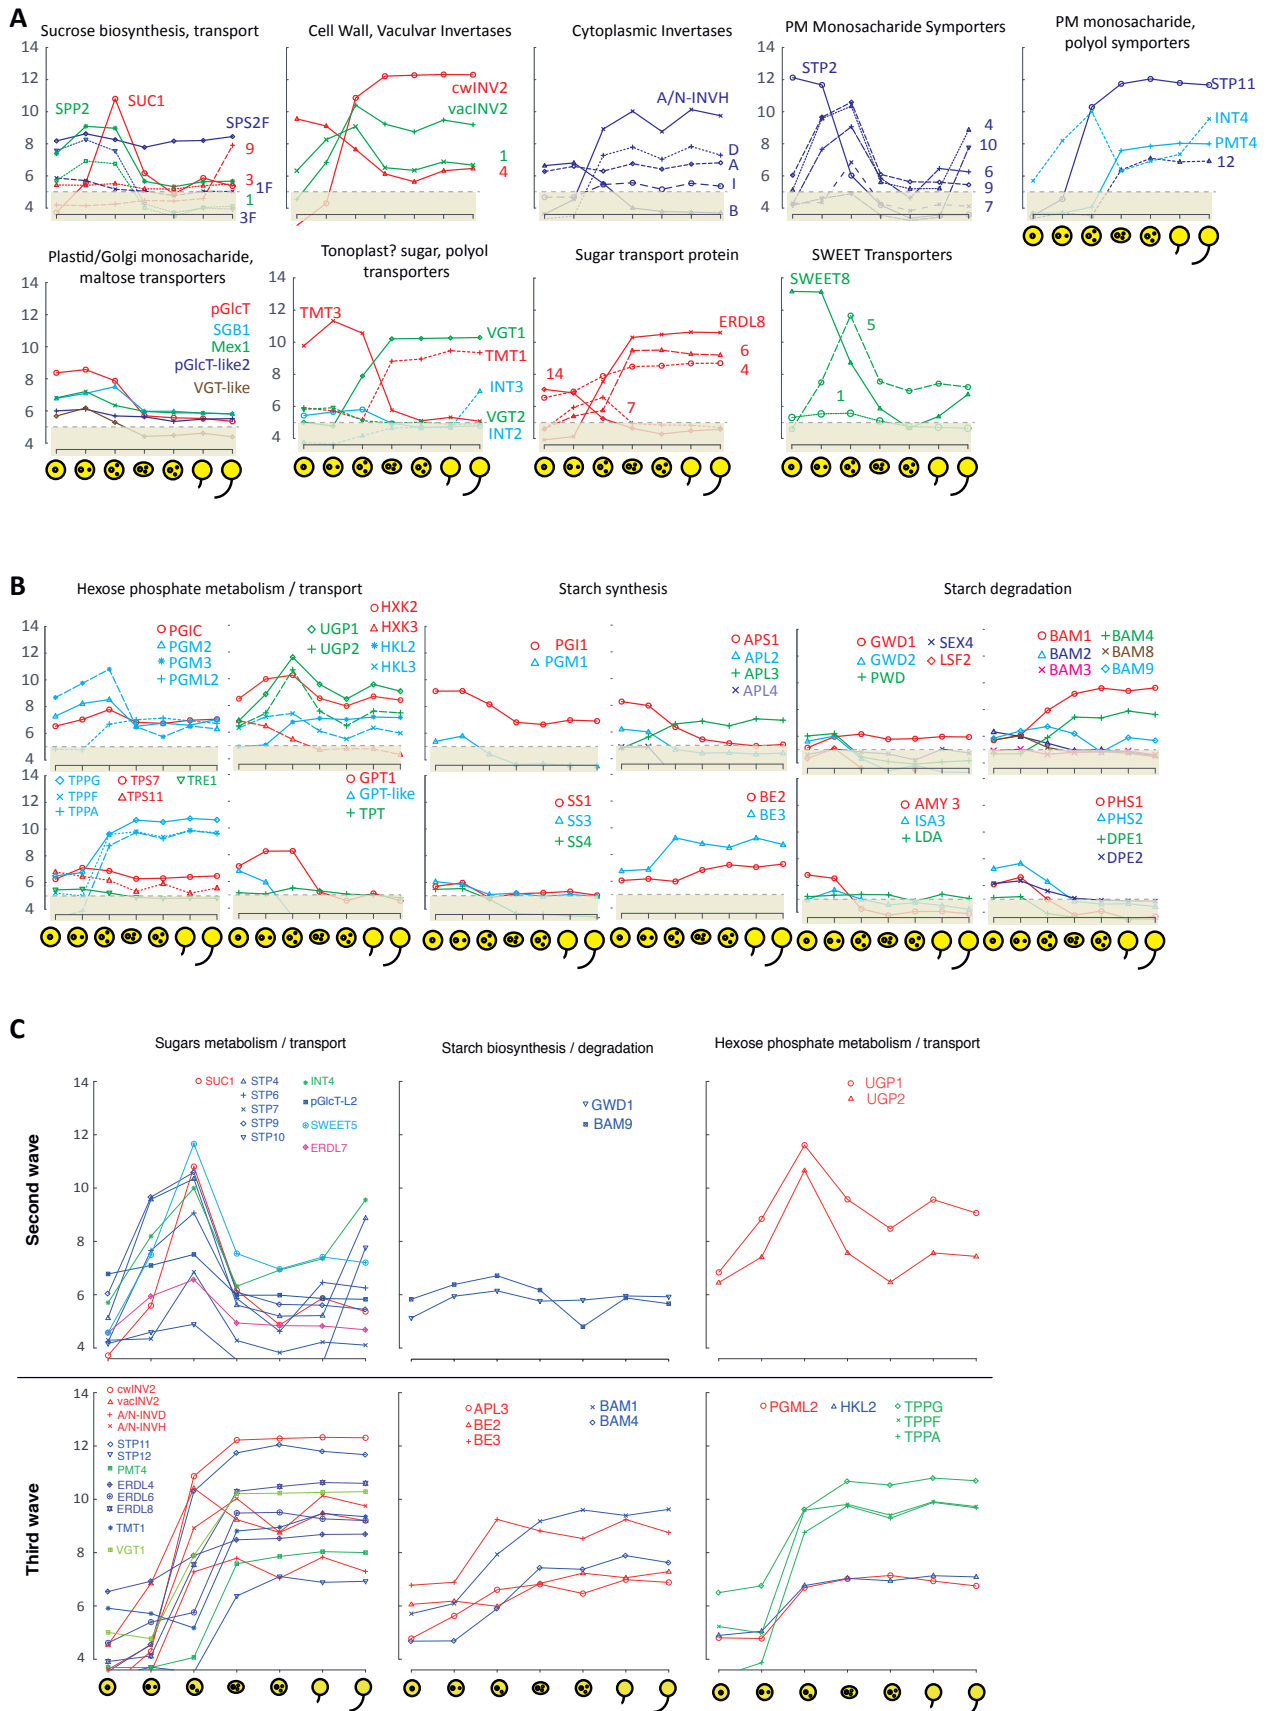

**Supplemental Figure S1.** Expression of carbohydrate transport and metabolism genes during pollen development. A. Expressions of sugar transport and metabolism genes. B. Expressions of hexose phosphate and starch transport and metabolism genes. C. The second and third carbohydrate gene expression clusters. Expression and co-expression values (log<sub>2</sub>-scale of expression values) are given for microspore development (first 4 x-axis ticks: microspore, bicellular, tricellular, and mature pollen grains), and during in vitro pollen tube growth (last 3 x-axis ticks: hydrated pollen grain, and 30 min and 240 min after germination). Refer to Table S1 for full names of the genes.

**Supplemental Figure S2.** Expression values (log<sub>2</sub>-scale) for hexose phosphate and starch metabolism gene during the developments of different flower and silique organs/tissues/cells (Figures S2.1-S2.6: pages 3-8). Comparing gene expression within the pollen grain and the chalazal region of the seed with other flower and seed organs/tissues/cells, some important specificities can be distinguished; we will report just few cases , which we consider important for our subject. First, the higher representation of gene members per pathway within some floral organs, as is the case for the whole flower or the carpel, might be explained by their higher tissue heterogeneity. Second there was a ubiquitous variation in the isoforms used in practically every step of both metabolic pathways between the different tissues/organs/cells. As an illustration we will comment on *APL* and *SS* isoforms. A predominance of *APL3* can be found within the stamen (together with *APL4*), the nectaries (together with *APL2*), and the seed. Based on our microscopical analysis, starch biosynthesis within reproductive cells was highest within the central cell and this seems to be paralleled by relatively higher expression levels of starch metabolism genes. Although the expression levels within these cells were generally lower compared to other flower and seed tissues, a predominance of *APL2* was observed within the MMC, the sperm cell or the egg cell whereas the predominance of *APL3* appears to characterize the central cell. The carpel and the pedicel were the only flower organs to show a relatively higher expression level of the mesophyll cells isoform *APL1* together with a high expression levels in *APL2*, *APL3*, and *APL4*. Concerning the starch synthase activity, while in the pollen grain no significant levels for *SS2* were found, the chalazal seed coat showed no significant transcript levels for *SS4*; and both organs showed no significant levels of the *GBSS*. Furthermore, only *SS1* showed some significant expression levels within generative reproductive cells.

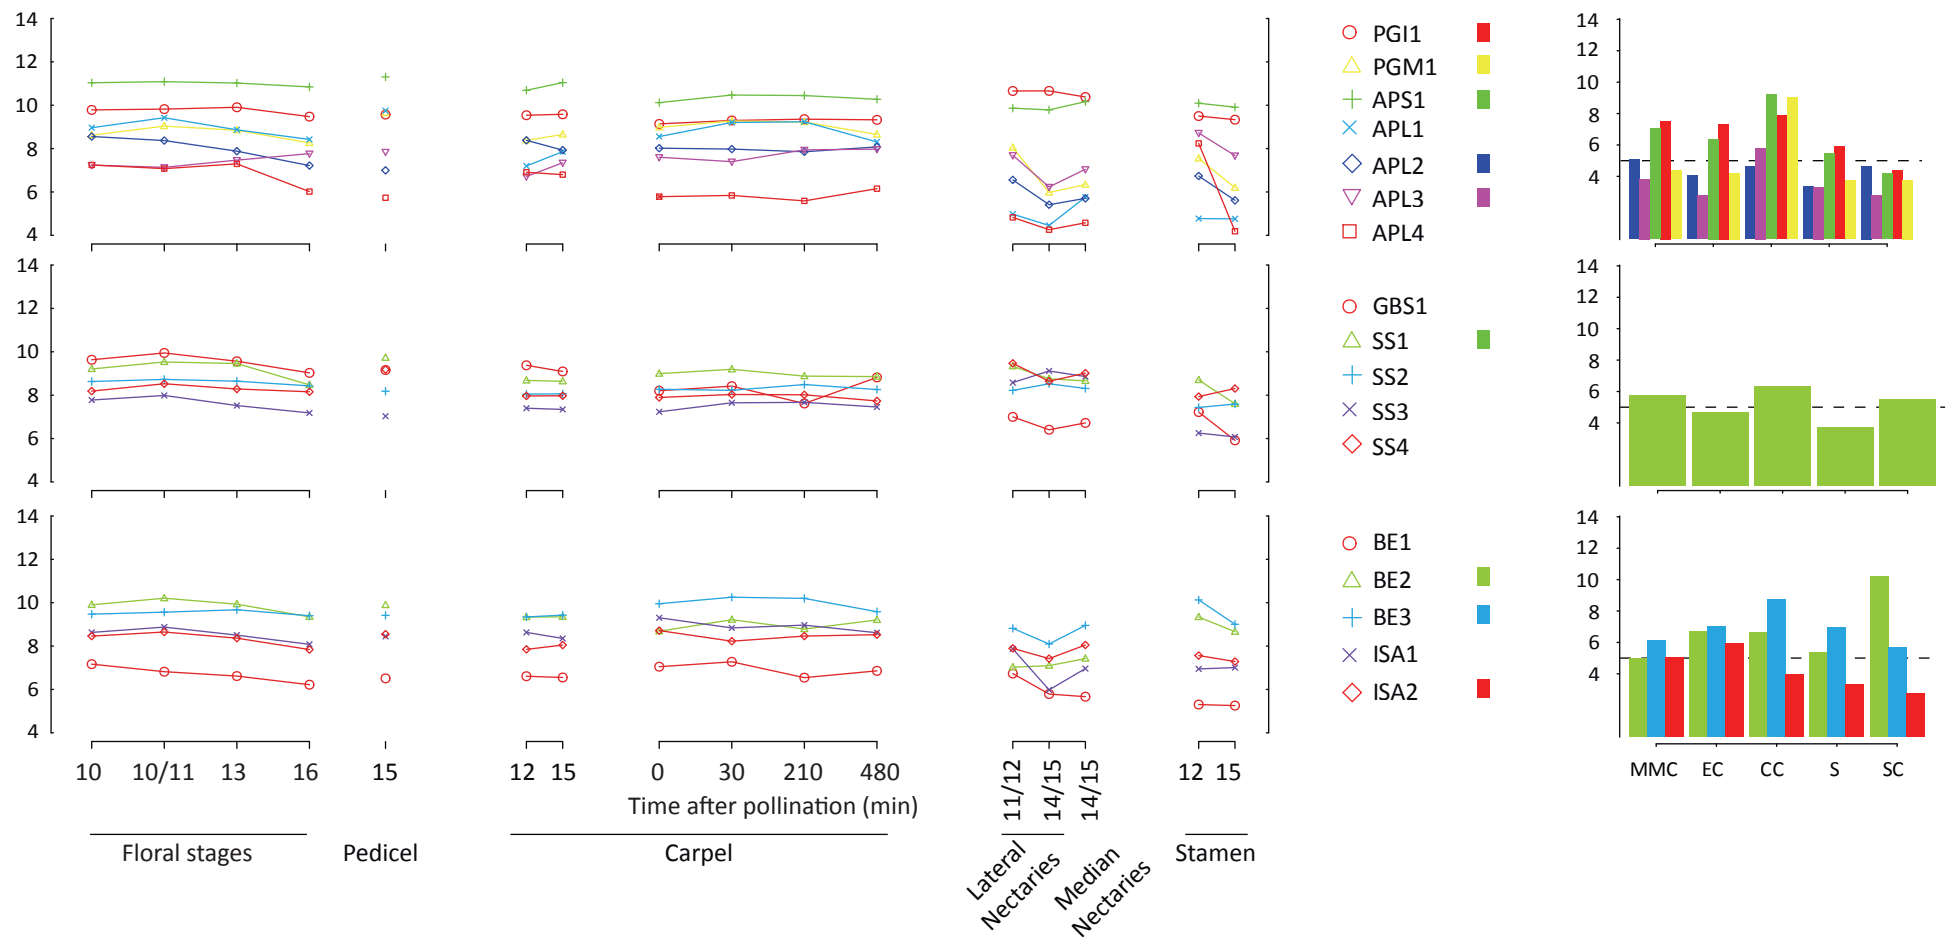

**Figure S2.1** Transcript levels for starch synthesis genes at different floral stages, within different floral organs, within the carpel at different times after pollination, and within different gametic cells (MMC: megaspore mother cell, EC: egg cell, CC: central cell, S: synergid, SC: sperm cell).

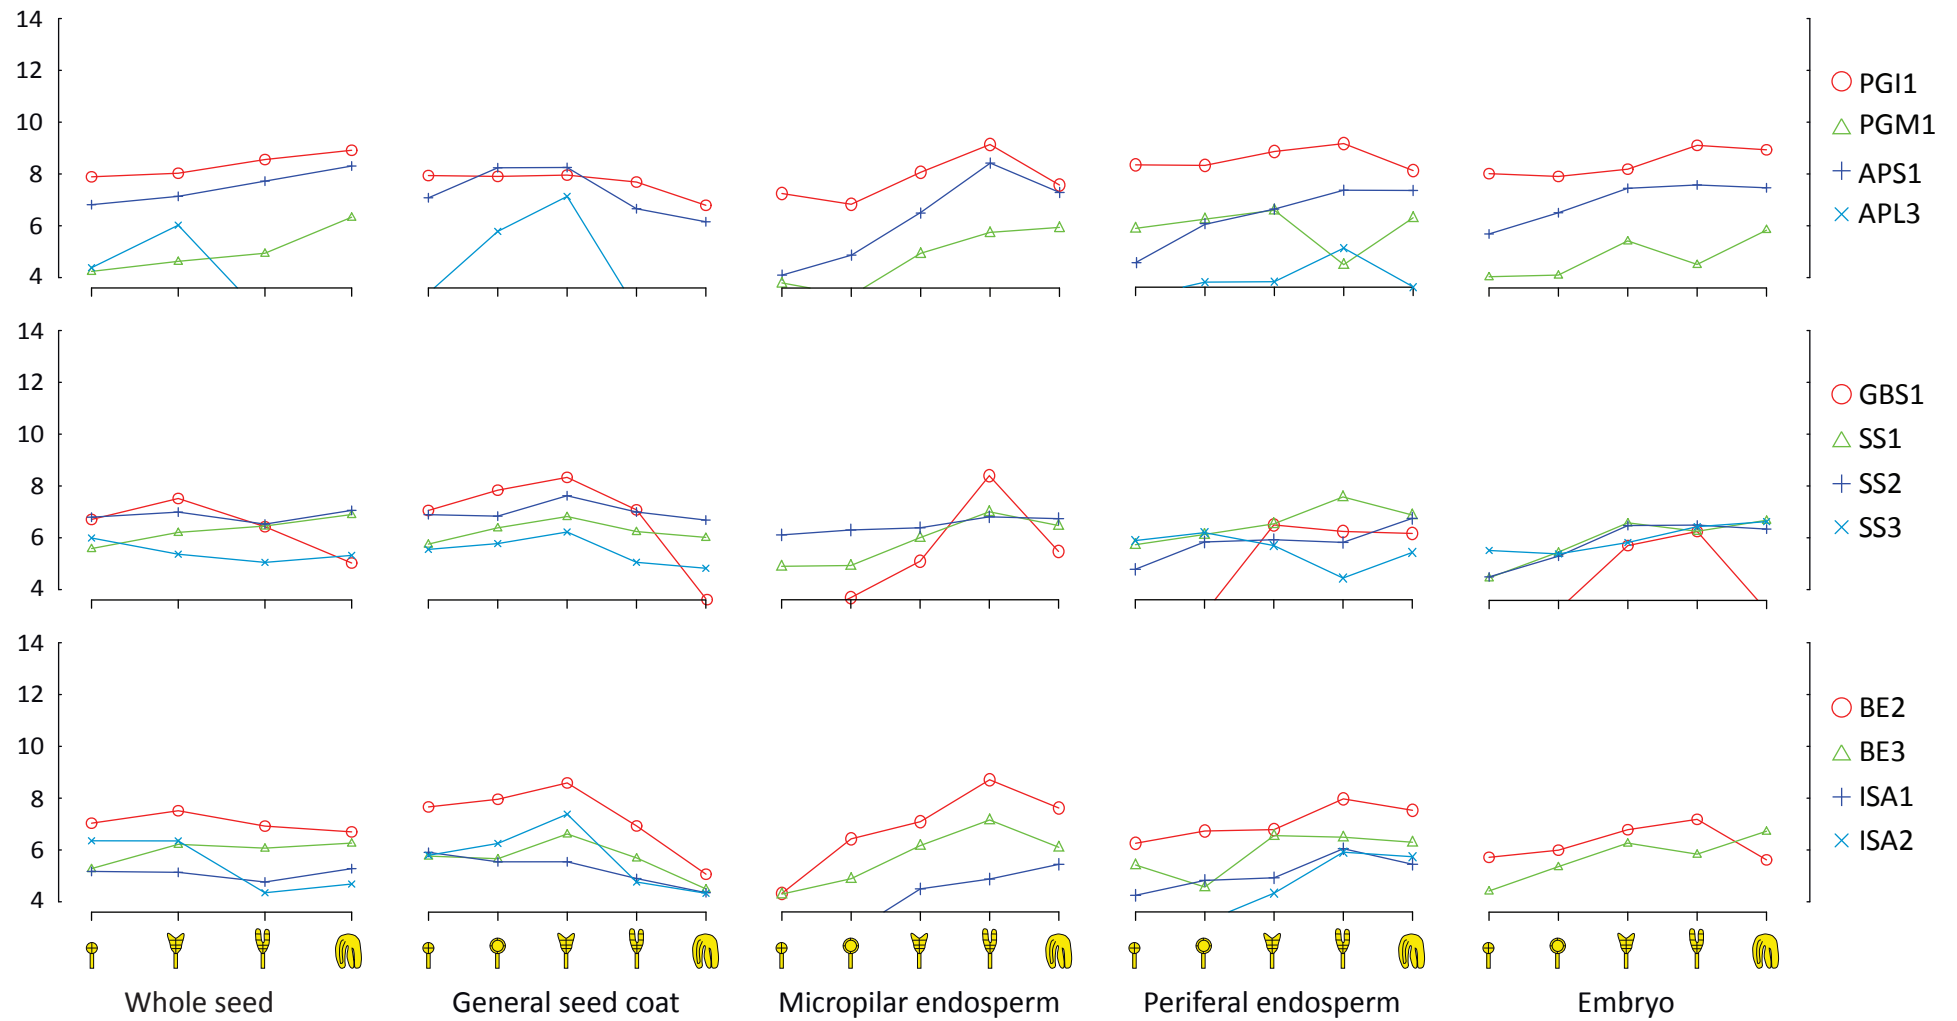

**Figure S2.2** Transcript levels for starch synthesis genes at different whole seed, general seed coat, micropilar and periferal endosperm, and embryo developmental stages

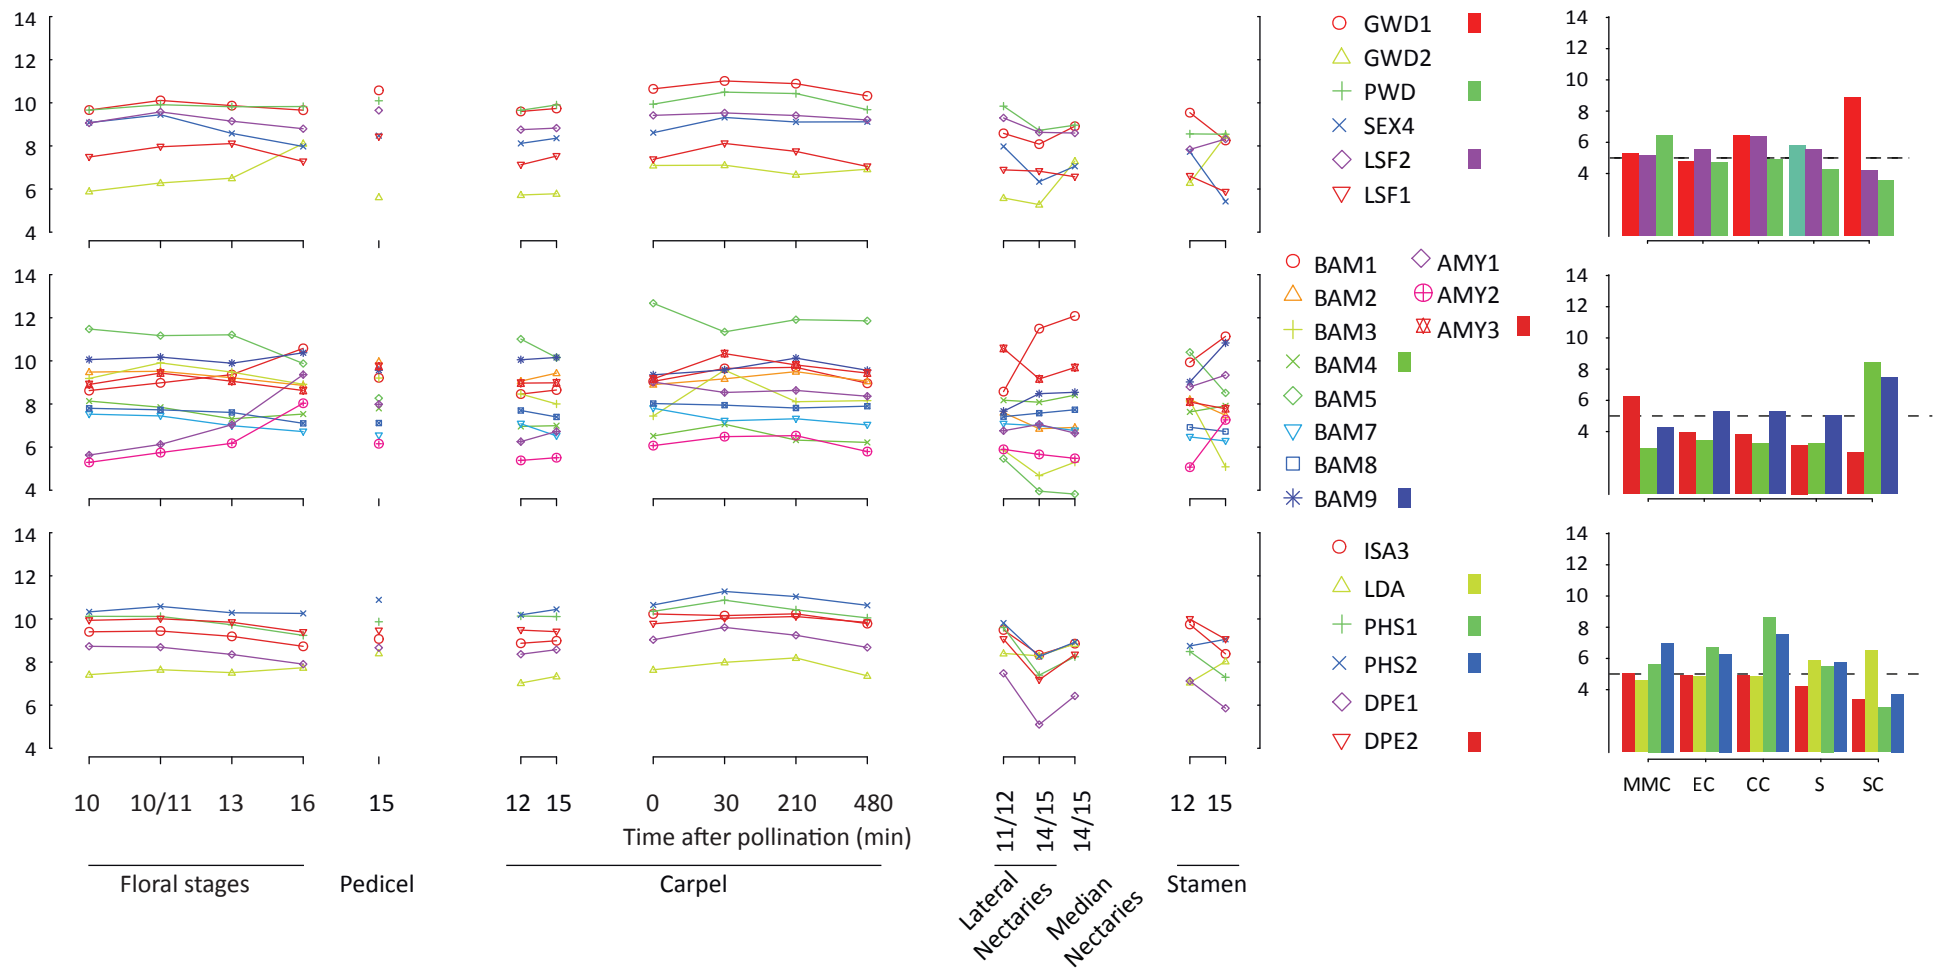

**Figure S2.3** Transcript levels for starch degradation genes at different floral stages, within different floral organs, within the carpel at different times after pollination, and within different gametic cells (MMC: megaspore mother cell, EC: egg cell, CC: central cell, S: synergid, SC: sperm cell).

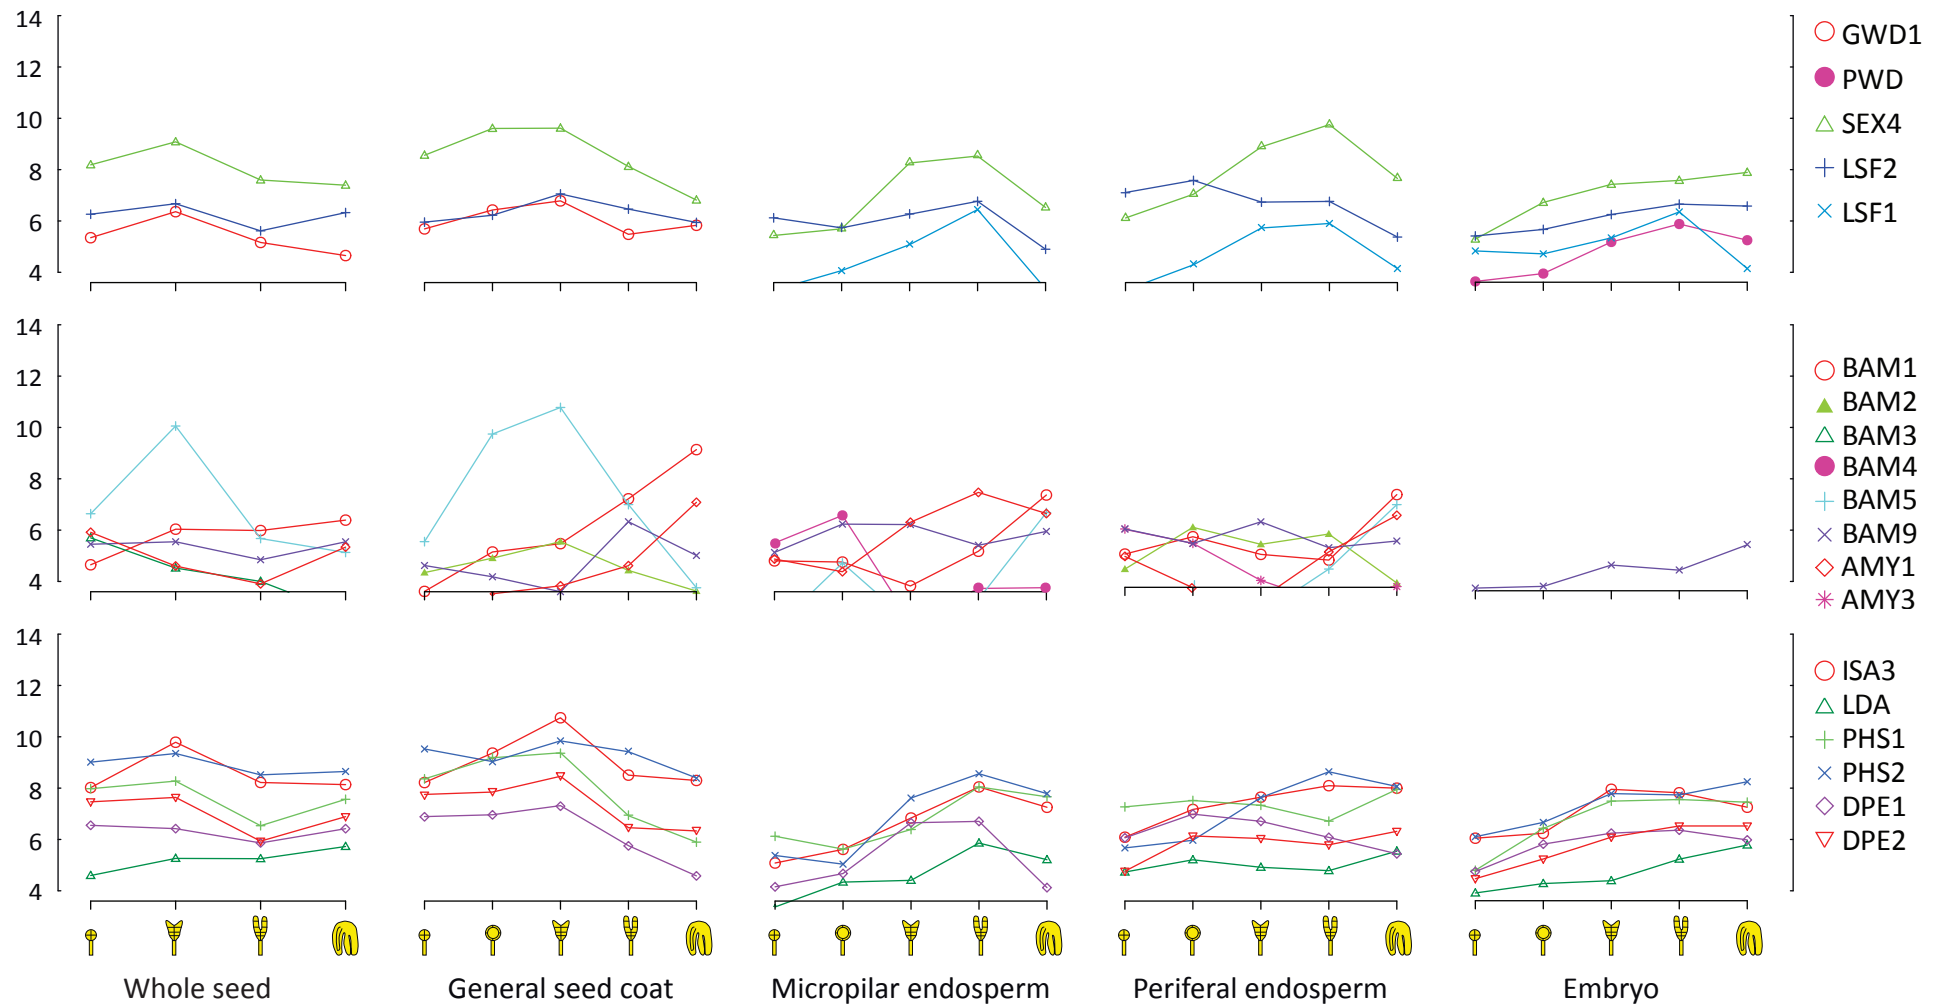

**Figure S2.4** Transcript levels for starch degradation genes at different whole seed, general seed coat, micropilar and periferal endosperm, and embryo developmental stages

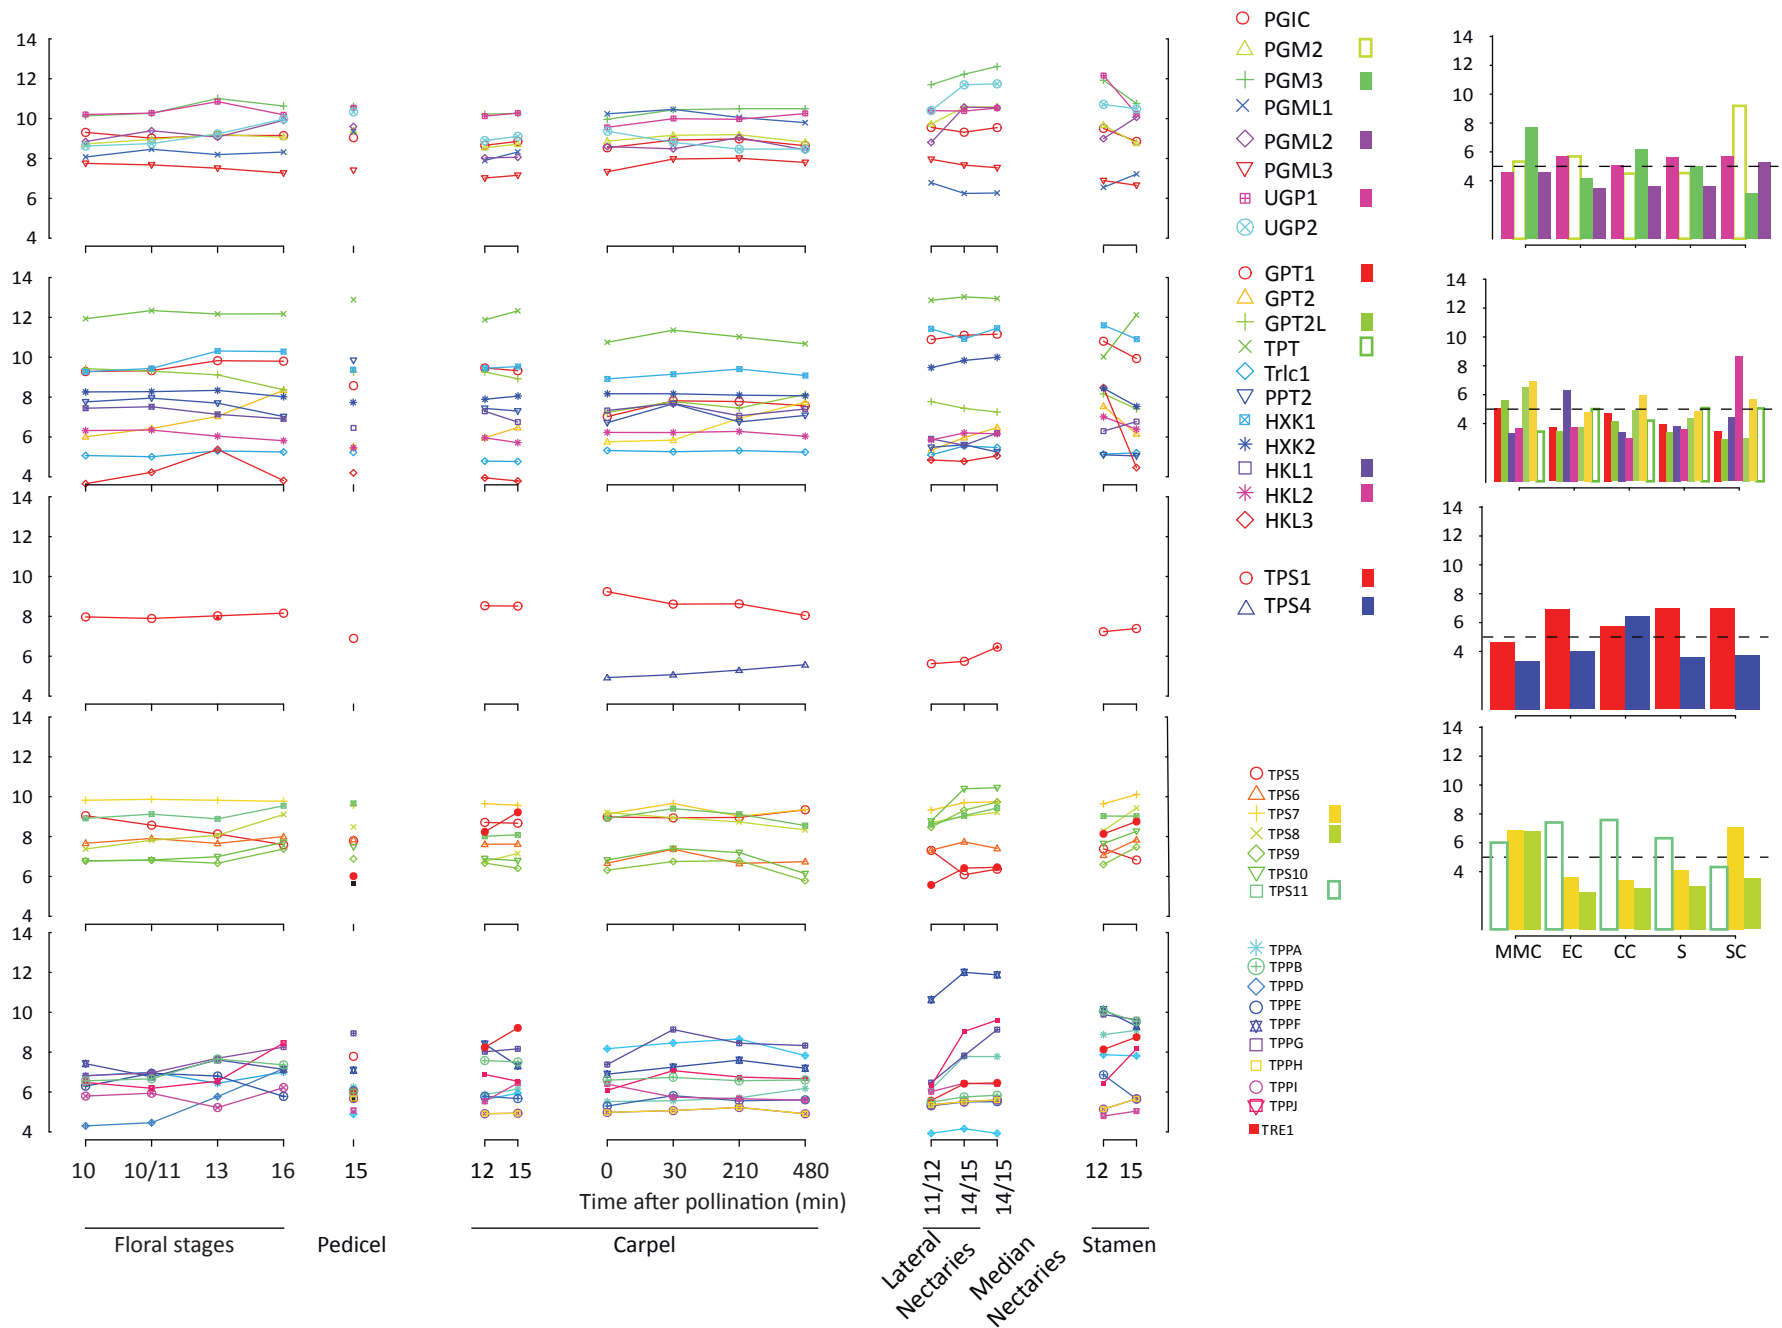

**Figure S2.5** Transcript levels for hexose phosphate metabolism and translocation genes at different floral stages, within different floral organs, within the carpel at different times after pollination, and within different gametic cells (MMC: megaspore mother cell, EC: egg cell, CC: central cell, S: synergid, SC: sperm cell).

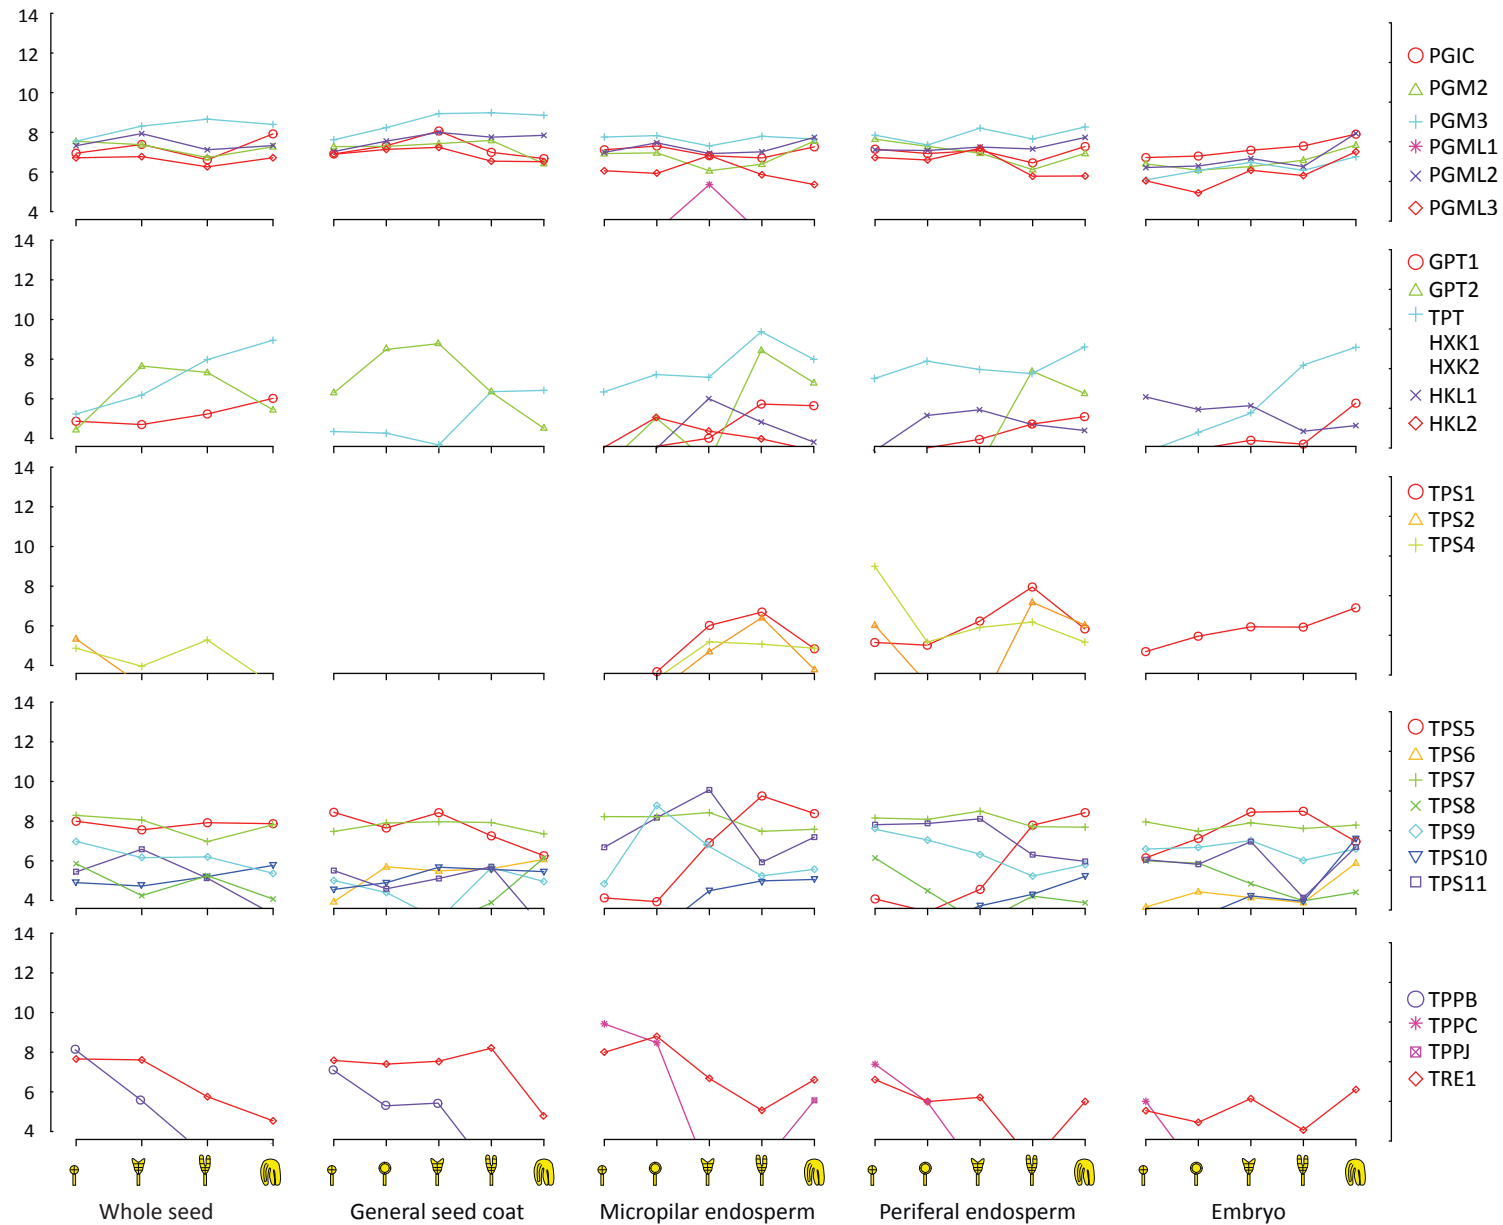

**Figure S2.6** Transcript levels for hexose phosphate metabolism and translocation genes at different whole seed, general seed coat, micropilar and peripheral endosperm, and embryo developmental stages



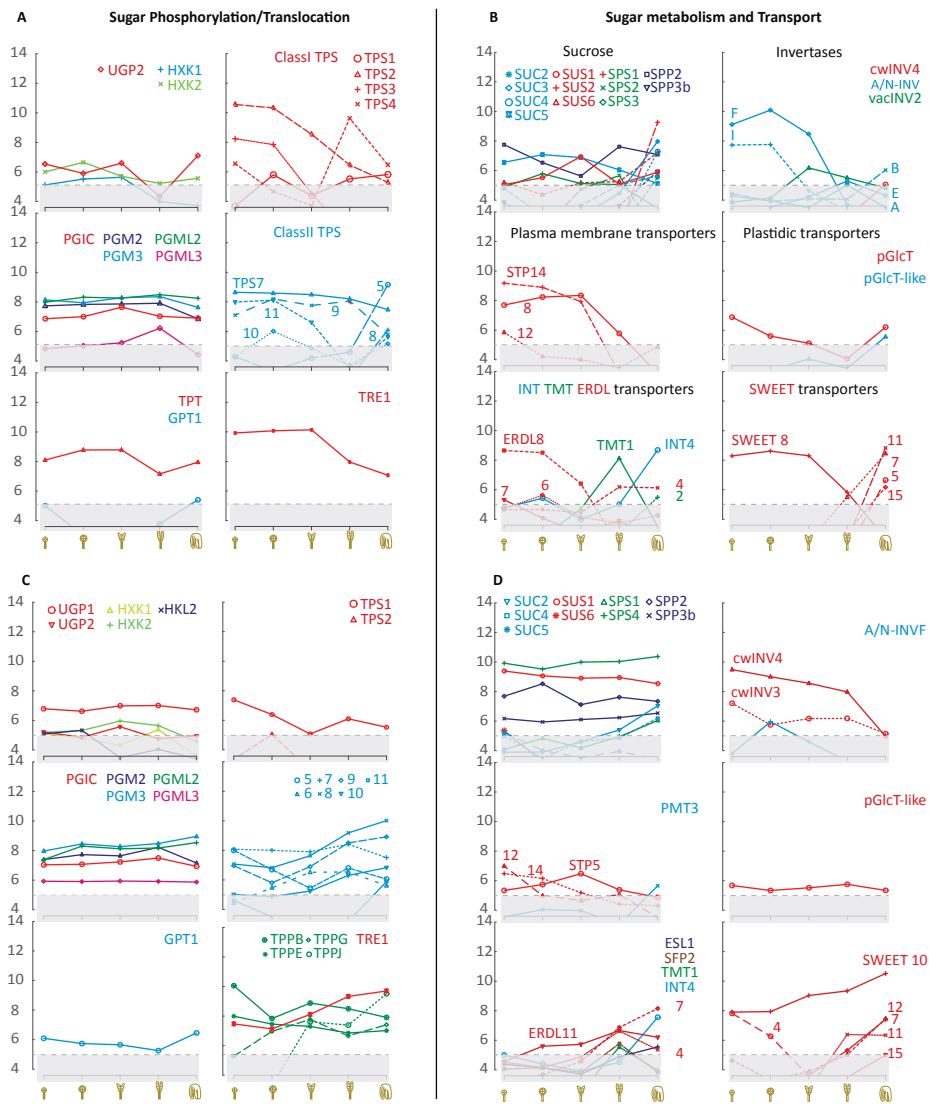

**Supplemental Figure S3.** Full list of sugar and sugar phosphate transport and metabolism genes expressed in the chalazal region of the seed. Expression values (log<sub>2</sub>-scale) in the chalazal endosperm (A,B), and the chalazal seed coat (C,D).

**Supplemental Figure S4** Expression values (log<sub>2</sub>-scale) for sugar transport and metabolism gene during the developments of different flower and silique organs/tissues/cells (Figures S4.1-S4.6: pages 11-16). Briefly, both general and specific patterns can be distinguished. General patterns: (i) While many gene members from the same family are expressed in different flower organs, single cell analysis revealed less representation per transporter family, (ii) the expression of these genes at the whole flower level appears uninformative and mainly reflected the expression level within the carpel, (iii) the expression level within the carpel is globally steady during the first 8 hours after pollination, (iv) the highest variation was registered in the two analyzed stages of stamen development. Specific patterns: some genes were either highly expressed in all organs and stages or specific to some organs or developmental stages. Representatives of the former are *SPS1/SPP2*, *SUC2*, *cwINV1*, and *PMT5*. Representatives of the latter are *cwINV4* and *SWEET9* within the nectaries. Within the different reproductive cells analyzed, similar activities were found for sucrose biosynthesis and transport, and for *SWEET8*. Examples of cell-specific high expressions are *STP2* and *ERDL14* within the *MMC*, *PMT6* within the central cell, and *SPS2F*, *cwINV5* (an invertase not found at significant levels within any other floral organ/tissue), *vacINV1*, and the mitochondrial neutral invertase A within the sperm cells.

Comparing the expression levels within the chalazal region (see main text, Figure 8) with those reported here for the peripheral and micropylar endosperm, for the embryo, and for the whole seed coat, a globally similar activities in the three endosperm regions are found except for invertase activities at early stages of embryo development. The highest expression levels of cell wall and cytoplasmic invertase activities occur indeed within the chalazal seed coat and the chalazal endosperm, respectively. All other tissues, including the embryo and the whole seed coat, either express a lower invertase activity or don't show any significant expression level.

### Sucrose metabolism

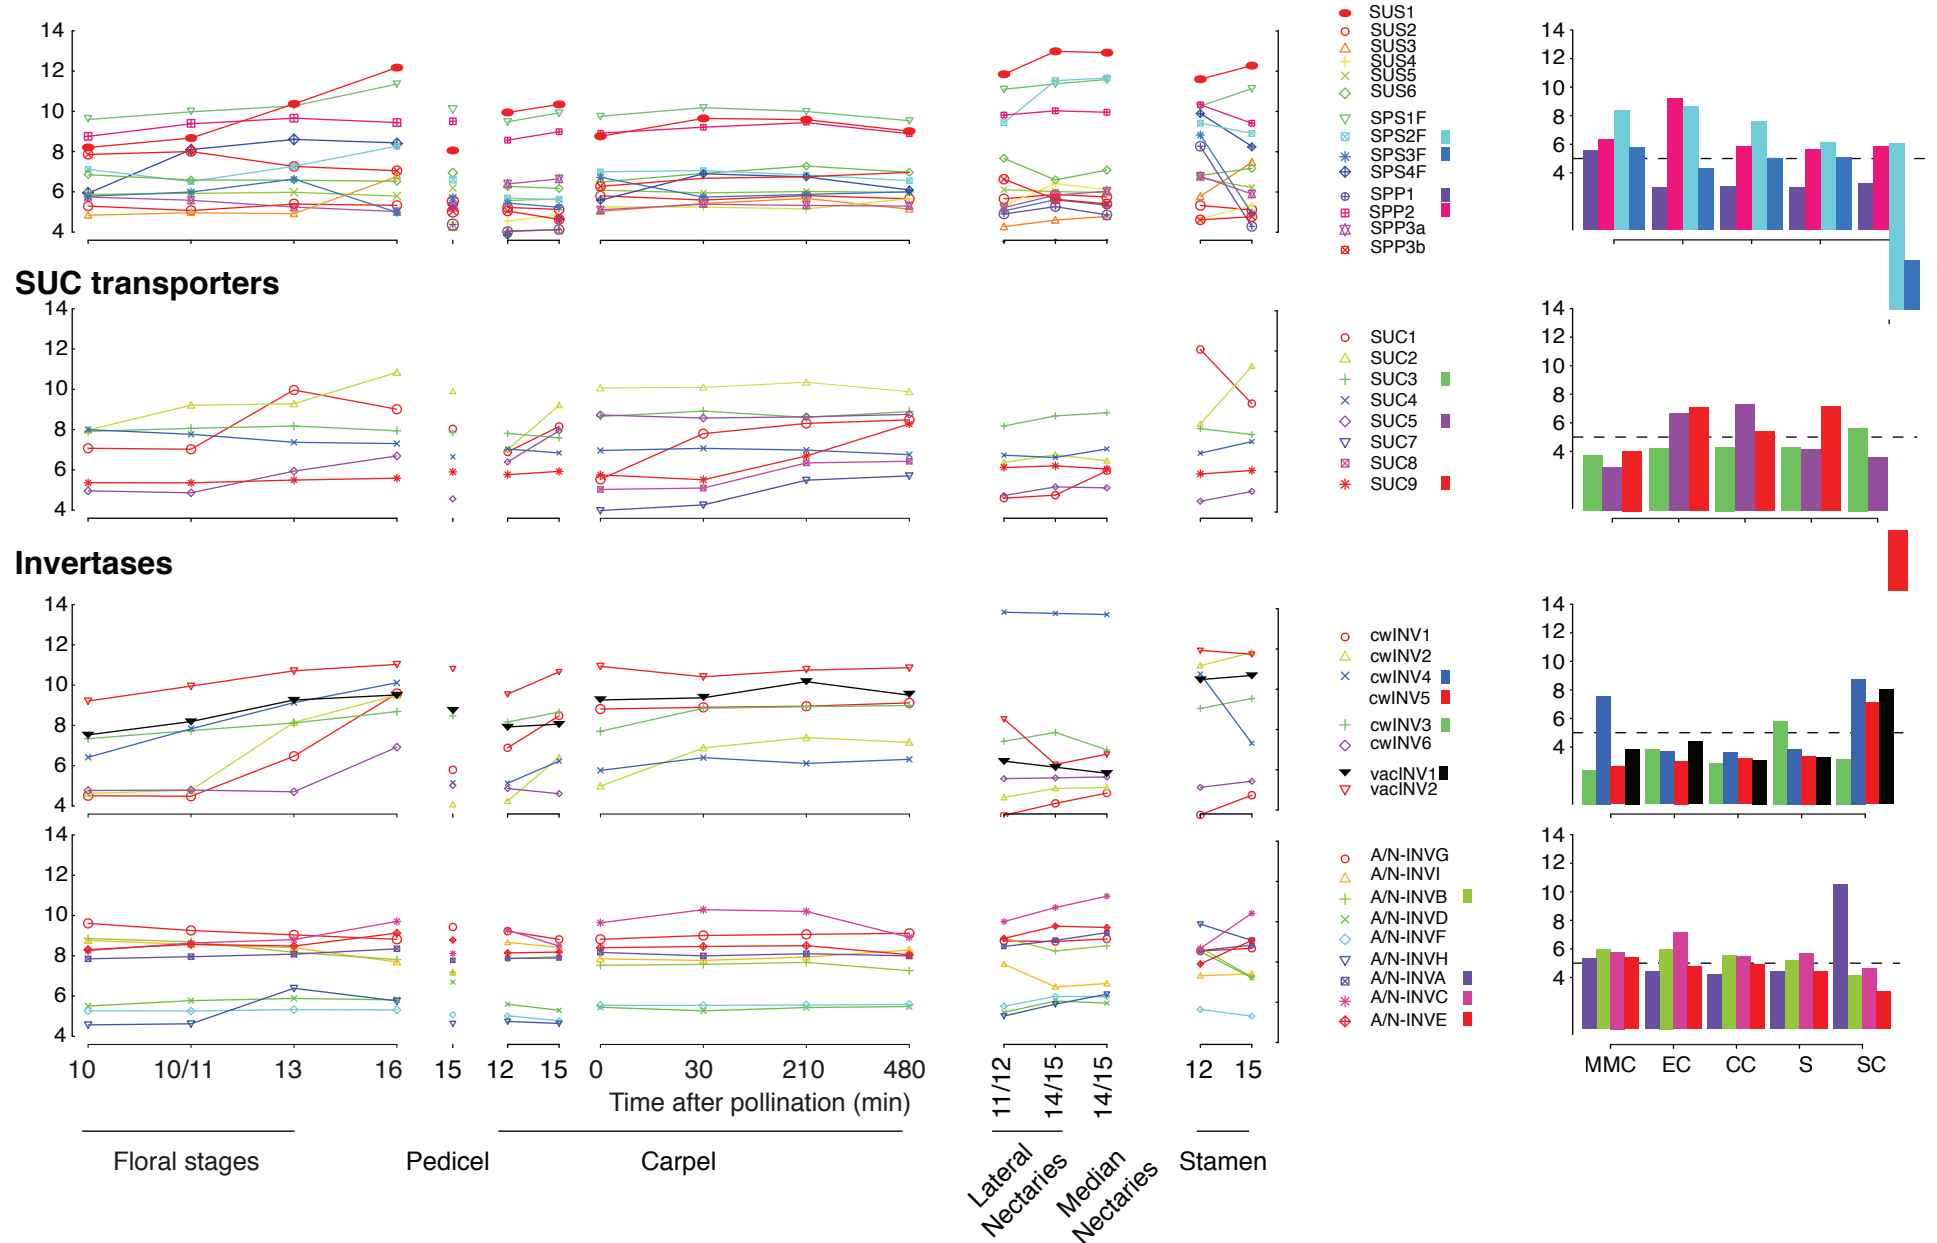

**Figure S4.1** Transcript levels for sucrose transport/metabolism and invertase genes at different floral stages, within different floral organs, within the carpel at different times after pollination, and within different gametic cells (MMC: megaspore mother cell, EC: egg cell, CC: central cell, S: synergid, SC: sperm cell).

### Sucrose metabolism

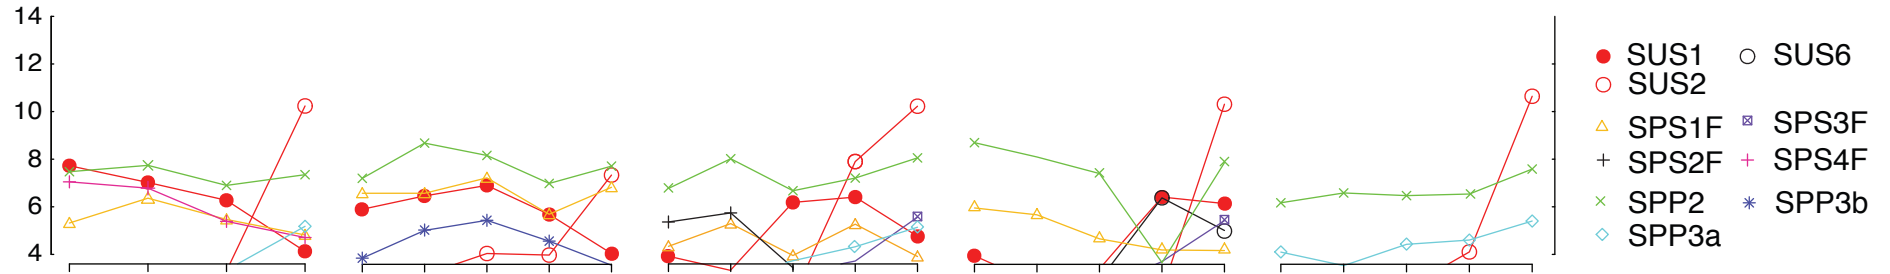

### SUC transporters

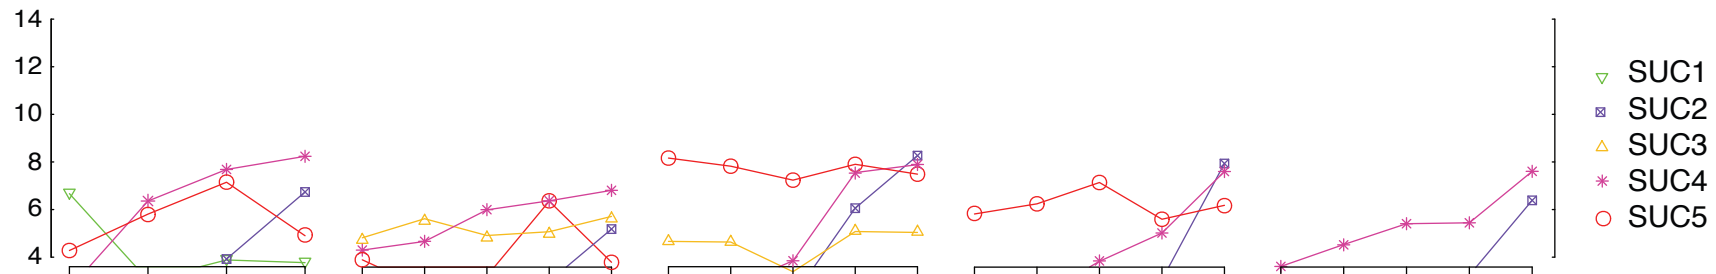

### Invertases

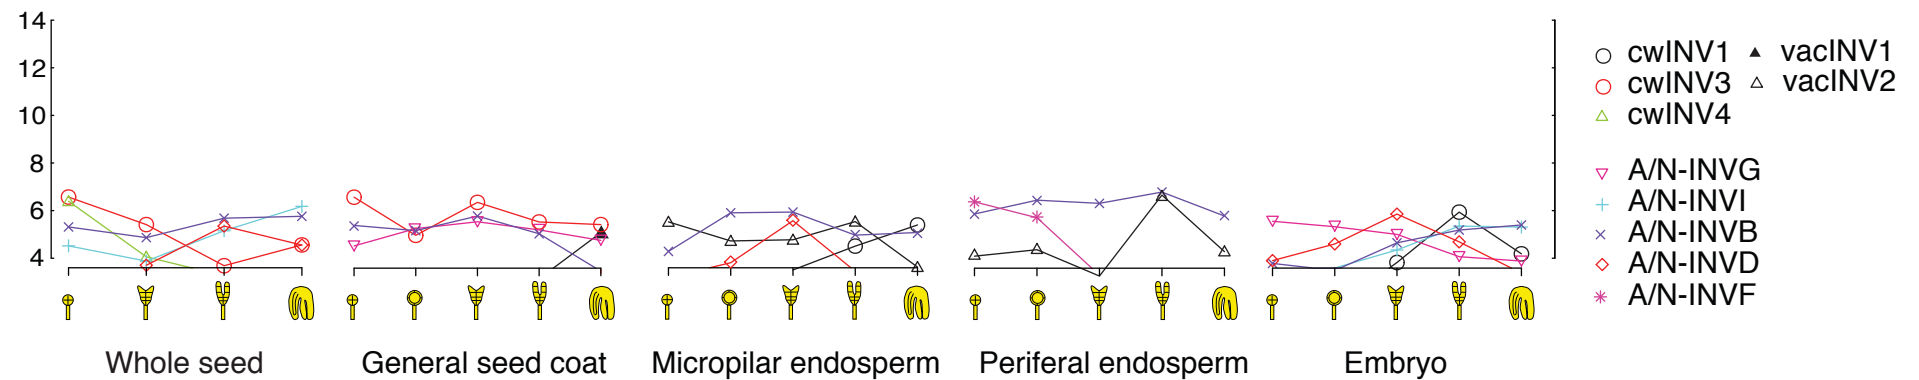

**Figure S4.2** Transcript levels for sucrose transport/metabolism and invertase genes at different whole seed, general seed coat, micropilar and periferal endosperm, and embryo developmental stages

### STPs/PMTs/INTs

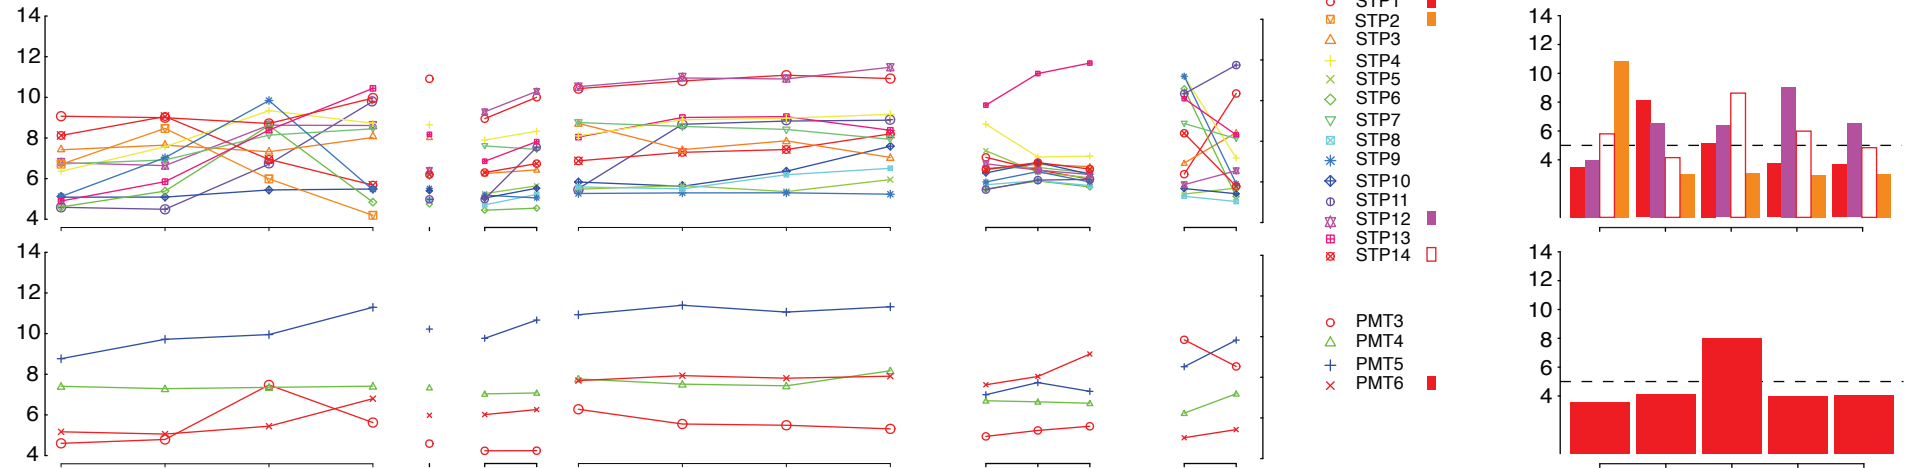

### Vacuolar/Plastidial transporters

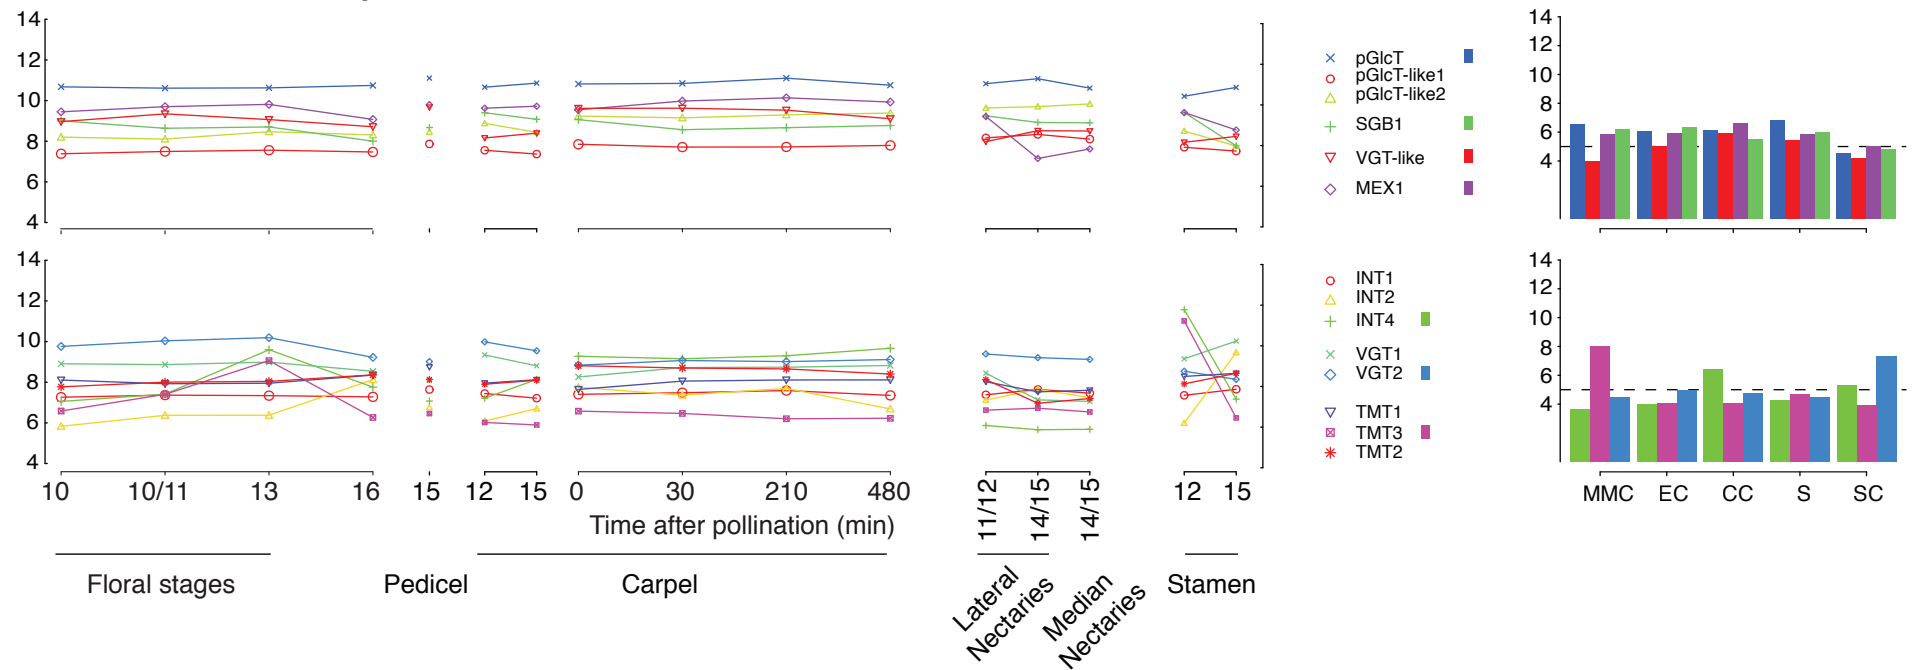

**Figure S4.3** Transcript levels for different sugar transport genes at different floral stages, within different floral organs, within the carpel at different times after pollination, and within different gametic cells (MMC: megaspore mother cell, EC: egg cell, CC: central cell, S: synergid, SC: sperm cell).

### STPs/PMTs/INTs

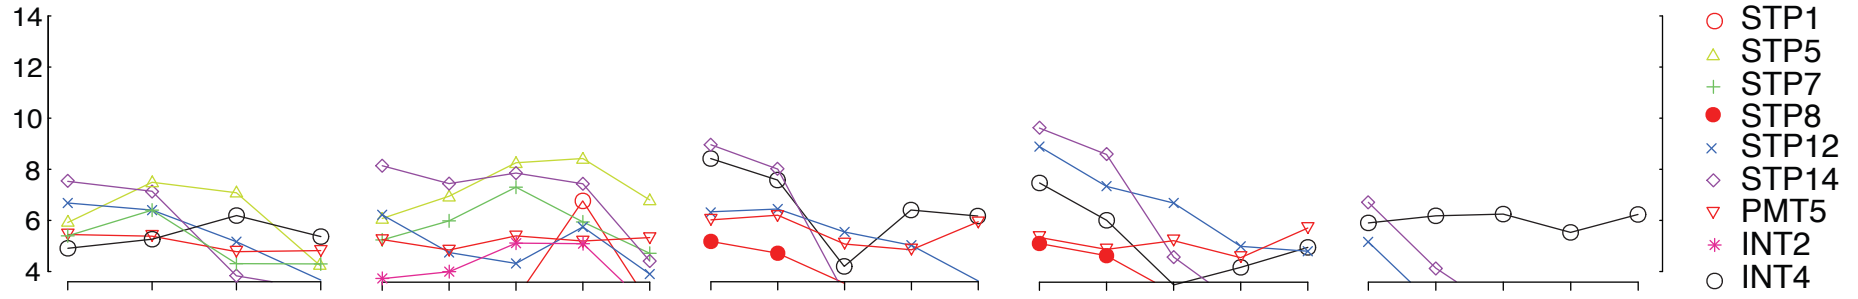

### Vacuolar/Plastidial transporters

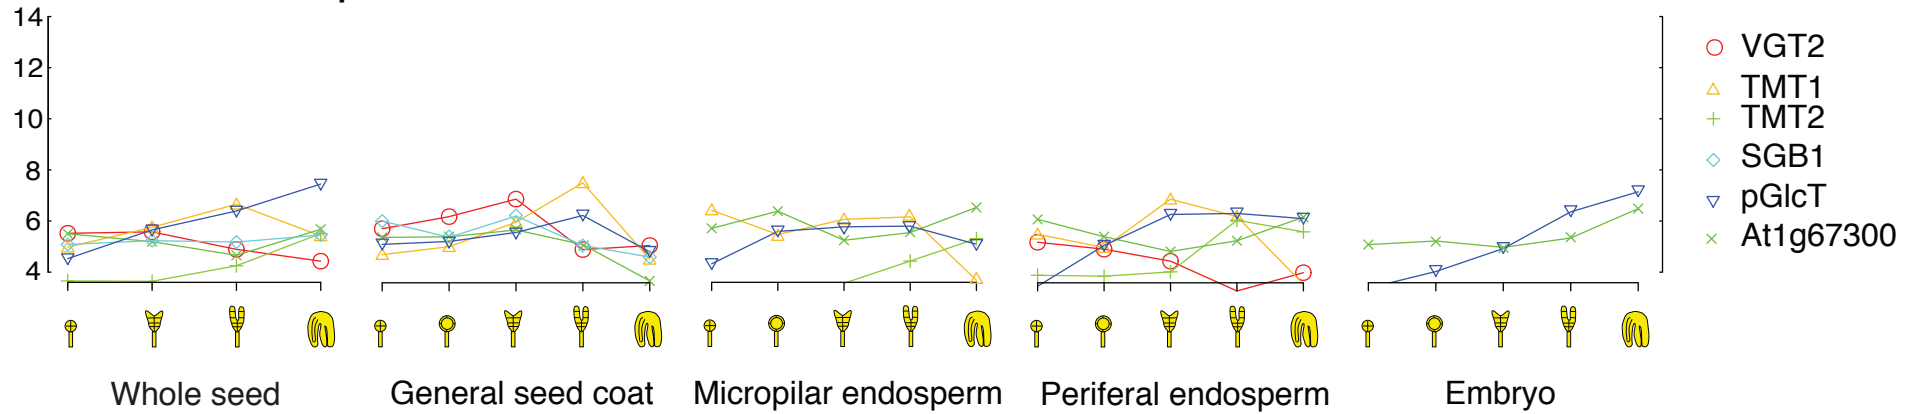

**Figure S4.4** Transcript levels for different sugar transport genes at different whole seed, general seed coat, micropilar and periferal endosperm, and embryo developmental stages

### ERDL transporters

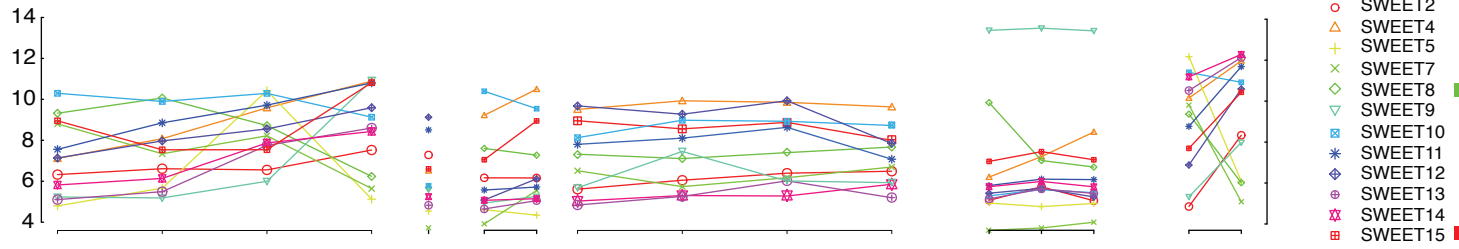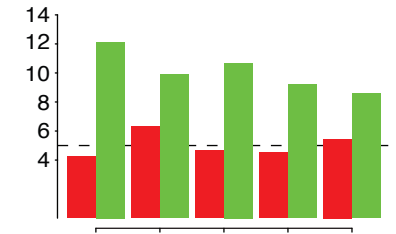

### SWEET transporters

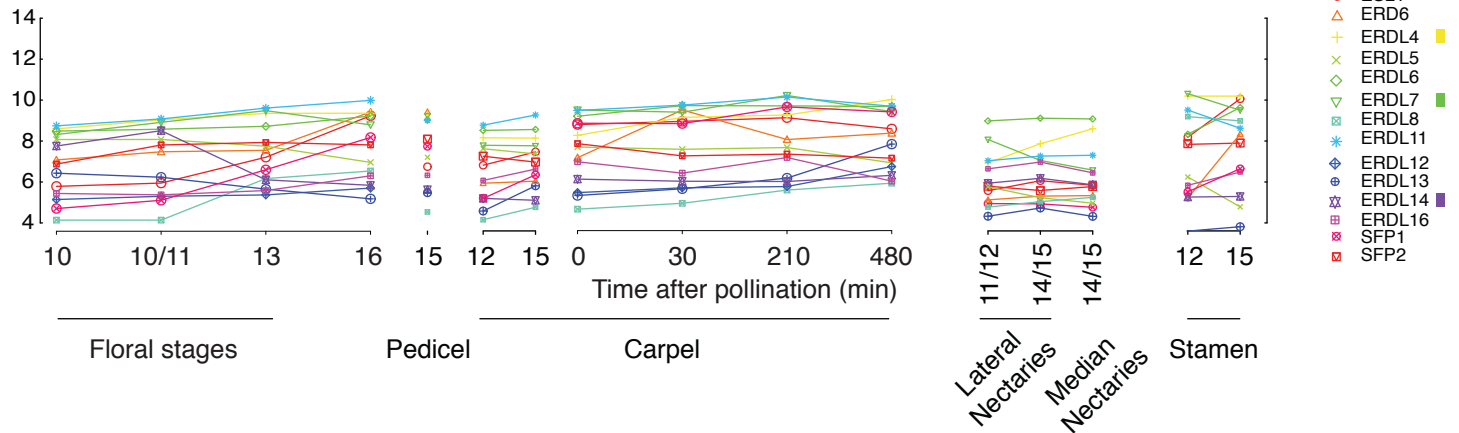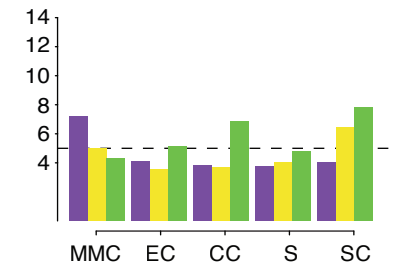

**Figure S4.5** Transcript levels for ERDL and SWEET transporter genes at different floral stages, within different floral organs, within the carpel at different times after pollination, and within different gametic cells (MMC: megaspore mother cell, EC: egg cell, CC: central cell, S: synergid, SC: sperm cell).

### ERDL transporters

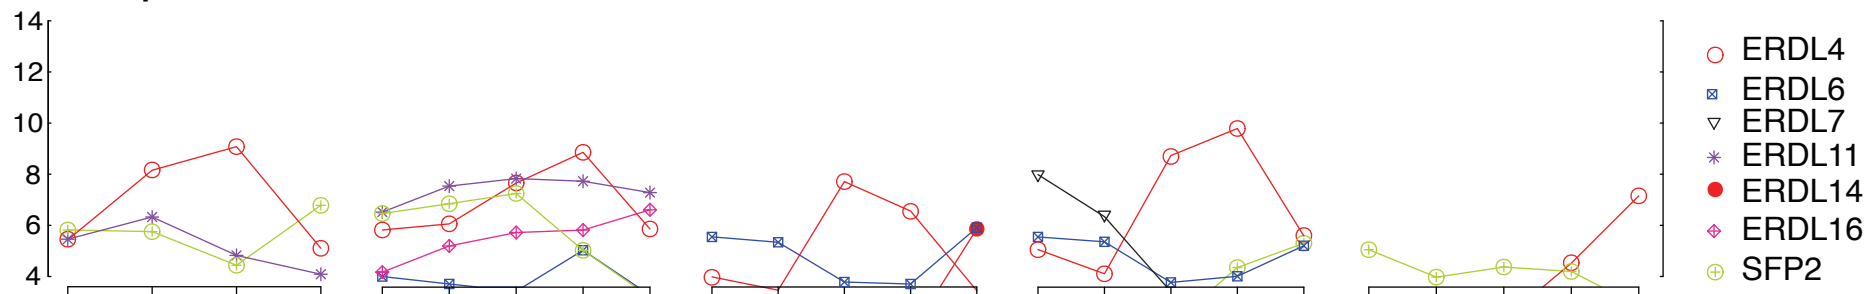

### SWEET transporters

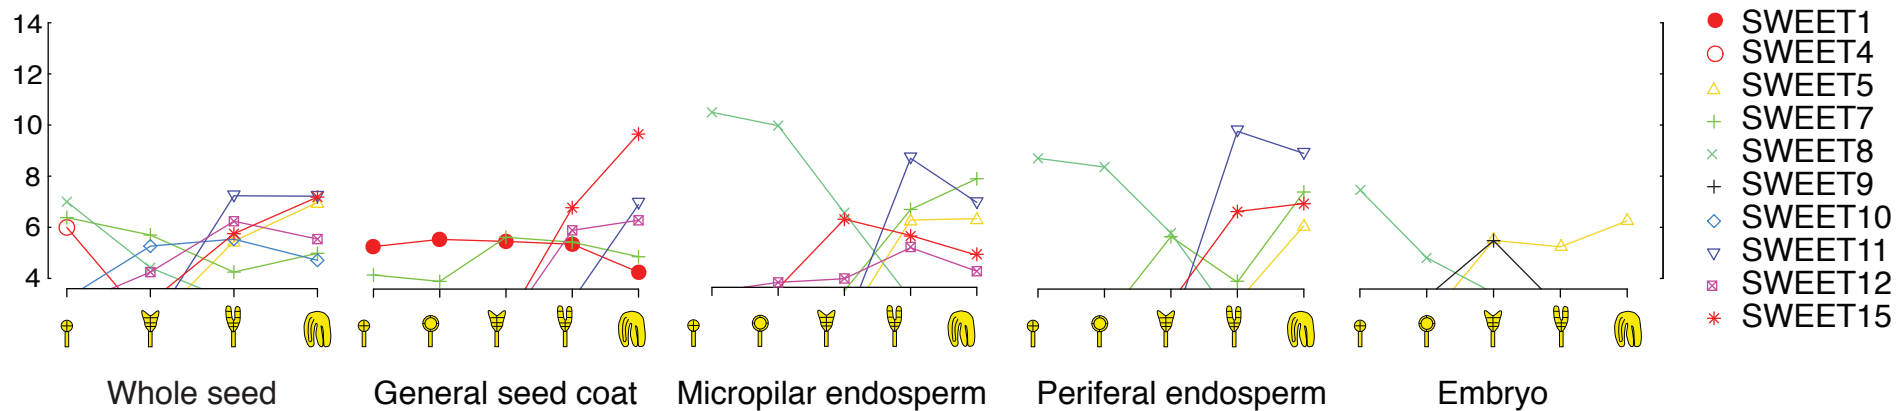

**Figure S4.6** Transcript levels for ERDL and SWEET transporter genes at different whole seed, general seed coat, micropilar and periferal endosperm, and embryo developmental stages



**Supplemental Table S1.** List of the carbohydrate metabolism and transport genes included in this study. A, Sugar genes. B, Hexose phosphate and starch genes. C, Array sets. D, Primers used in this study. E, Literature cited

**A- Sugar transport and metabolism genes**

| Gene name | Group                                               | Enzyme                                | Locus                | References                      |
|-----------|-----------------------------------------------------|---------------------------------------|----------------------|---------------------------------|
| SUS1      | <b>Sucrose synthesis/degradation</b>                | Sucrose Synthase1                     | At5g20830            | Fallahi et al. 2008             |
| SUS2      |                                                     | Sucrose Synthase2                     | At5g49190            |                                 |
| SUS3      |                                                     | Sucrose Synthase3                     | At4g02280            |                                 |
| SUS4      |                                                     | Sucrose Synthase4                     | At3g43190            |                                 |
| SUS5      |                                                     | Sucrose Synthase5                     | At5g37180            |                                 |
| SUS6      |                                                     | Sucrose Synthase6                     | At1g73370            |                                 |
| SPS1F     | <b>Sucrose synthesis</b>                            | Sucrose Phosphate Synthase1F          | AT5G20280            | Lunn 2003, Lutfiyya et al. 2007 |
| SPS2F     |                                                     | Sucrose Phosphate Synthase2F          | AT5G11110            |                                 |
| SPS3F     |                                                     | Sucrose Phosphate Synthase3F          | AT1G04920            |                                 |
| SPS4F     |                                                     | Sucrose Phosphate Synthase4F          | AT4G10120            |                                 |
| SPP1      |                                                     | Sucrose Phosphatase1                  | AT1G51420            |                                 |
| SPP3b     |                                                     | Sucrose Phosphatase3b                 | AT3G52340            |                                 |
| SPP2      |                                                     | Sucrose Phosphatase2                  | AT2G35840            |                                 |
| SPP3a     |                                                     | Sucrose Phosphatase3a                 | At3G54270            |                                 |
| AtSUC1    |                                                     | <b>Sucrose transporters</b>           | sucrose-H+ symporter |                                 |
| AtSUC2    | sucrose-H+ symporter                                |                                       | At1g22710            |                                 |
| AtSUC3    | Sucrose-H+ symporter                                |                                       | At2g02860            |                                 |
| AtSUC4    | sucrose-H+ symporter                                |                                       | At1g09960            |                                 |
| AtSUC5    | sucrose-H+ symporter                                |                                       | At1g71890            |                                 |
| AtSUC6    | sucrose transporter-like protein (non-functional ?) |                                       | At5g43610            |                                 |
| AtSUC7    | sucrose transporter-like protein                    |                                       | At1g66570            |                                 |
| AtSUC8    | sucrose-H+ symporter                                |                                       | At2g14670            |                                 |
| AtSUC9    | sucrose-H+ symporter                                |                                       | At5g06170            |                                 |
| AtcwINV1  | <b>Cell wall acid invertases</b>                    | Cell Wall Invertase 1                 | At3g13790            | Sherson et al. 2003             |
| AtcwINV2  |                                                     | Cell Wall Invertase 2                 | At3g52600            |                                 |
| AtcwINV3  |                                                     | Cell Wall Invertase 3                 | At1g55120            |                                 |
| AtcwINV4  |                                                     | Cell Wall Invertase 4                 | At2g36190            |                                 |
| AtcwINV5  |                                                     | Cell Wall Invertase 5                 | At3g13784            |                                 |
| AtcwINV6  |                                                     | Cell Wall Invertase 6                 | At5g11920            |                                 |
| AtvacINV1 | <b>Vacuolar acid invertases</b>                     | Vacuolar Invertase 1 (At_betafruct3 ) | At1g62660            | Sergeeva et al. 2006            |
| AtvacINV2 |                                                     | Vacuolar Invertase 2 (At_betafruct4)  | AT1G12240            |                                 |
| A/N-INVG  | <b>Cytoplasmic neutral invertases</b>               | Alkaline/neutral Invertase G (CINV1)  | At1g35580            | Vargas et al. 2008              |
| A/N-INVI  |                                                     | Alkaline/neutral Invertase I (CINV2)  | At4g09510            |                                 |
| A/N-INVB  |                                                     | Alkaline/neutral Invertase B          | At4g34860            |                                 |
| A/N-INVD  |                                                     | Alkaline/neutral Invertase D          | At1g22650            |                                 |
| A/N-INVF  |                                                     | Alkaline/neutral Invertase F          | At1g72000            |                                 |
| A/N-INVH  |                                                     | Alkaline/neutral Invertase H          | At3g05820            |                                 |
| A/N-INVA  |                                                     | Alkaline/neutral Invertase A          | At1g56560            |                                 |
| A/N-INVC  |                                                     | Alkaline/neutral Invertase C          | At3g06500            |                                 |
| A/N-INVE  |                                                     | Alkaline/neutral Invertase E          | At5g22510            |                                 |
| AtSTP1    | <b>Sugar Transport Protein</b>                      | Monosaccharide-H+ symporter           | At1g11260            |                                 |
| AtSTP2    |                                                     |                                       | At1g07340            |                                 |
| AtSTP3    |                                                     |                                       | At5g61520            |                                 |
| AtSTP4    |                                                     |                                       | At3g19930            |                                 |
| AtSTP5    |                                                     |                                       | At1g34580            |                                 |
| AtSTP6    |                                                     |                                       | At3g05960            |                                 |
| AtSTP7    |                                                     |                                       | At4g02050            |                                 |

|                 |                                              |                                                  |                  |                                                                                                                                                           |
|-----------------|----------------------------------------------|--------------------------------------------------|------------------|-----------------------------------------------------------------------------------------------------------------------------------------------------------|
| AtSTP8          |                                              |                                                  | At5g26250        | Buettner and Sauer 2000,<br><a href="https://www.arabidopsis.org/browse/genefamily/Monos.jsp">https://www.arabidopsis.org/browse/genefamily/Monos.jsp</a> |
| AtSTP9          |                                              |                                                  | At1g50310        |                                                                                                                                                           |
| AtSTP10         |                                              |                                                  | At3g19940        |                                                                                                                                                           |
| AtSTP11         |                                              |                                                  | At5g23270        |                                                                                                                                                           |
| AtSTP12         |                                              |                                                  | At4g21480        |                                                                                                                                                           |
| AtSTP13         |                                              |                                                  | At5g26340        |                                                                                                                                                           |
| AtSTP14         |                                              |                                                  | At1g77210        |                                                                                                                                                           |
| AtPMT1          | <b>Polyol/monosaccharide transporters</b>    | Polyol and monosaccharide H+ symporter PLT1      | At2g16120        |                                                                                                                                                           |
| AtPMT2          |                                              | Polyol and monosaccharide H+ symporter PLT2      | At2g16130        |                                                                                                                                                           |
| AtPMT3          |                                              | Polyol and monosaccharide H+ symporter PLT3      | At2g18480        |                                                                                                                                                           |
| AtPMT4          |                                              | Polyol and monosaccharide H+ symporter PLT4      | At2g20780        |                                                                                                                                                           |
| AtPMT5          |                                              | Polyol and monosaccharide H+ symporter PLT5      | At3g18830        |                                                                                                                                                           |
| AtPMT6          |                                              | Polyol and monosaccharide H+ symporter PLT6      | At4g36670        |                                                                                                                                                           |
| AtINT1          | <b>Inositol Transporters</b>                 | Putative polyol (cyclic) transporter             | At2g43330        |                                                                                                                                                           |
| AtINT2          |                                              |                                                  | At1g30220        |                                                                                                                                                           |
| AtINT3          |                                              |                                                  | At2g35740        |                                                                                                                                                           |
| AtINT4          |                                              |                                                  | At4g16480        |                                                                                                                                                           |
| AtVGT1          | <b>Vacuolar glucose transporters-like</b>    | Tonoplast sugar transport protein                | At3g03090        | Buettner and Sauer 2000, Williams et al. 2000                                                                                                             |
| AtVGTL1         |                                              |                                                  | At5g17010        |                                                                                                                                                           |
| AtVGTL2         |                                              |                                                  | At5g59250        |                                                                                                                                                           |
| AtTMT1          | <b>Tonoplast Monosaccharide transporters</b> | Tonoplast monosaccharide transporter             | At1g20840        | Buettner and Sauer 2000,<br><a href="https://www.arabidopsis.org/browse/genefamily/Monos.jsp">https://www.arabidopsis.org/browse/genefamily/Monos.jsp</a> |
| AtTMT2          |                                              |                                                  | At4g35300        |                                                                                                                                                           |
| AtTMT3          |                                              |                                                  | At3g51490        |                                                                                                                                                           |
| At1g05030       | <b>Plastidic sugar transporters</b>          | Putative monosaccharide transporter              | At1g05030        | Buettner and Sauer 2000, Williams et al. 2000                                                                                                             |
| At1g67300       |                                              |                                                  | At1g67300        |                                                                                                                                                           |
| SGB1            |                                              |                                                  | At1g79820        |                                                                                                                                                           |
| pGlcT           |                                              |                                                  | At5g16150        |                                                                                                                                                           |
| MEX1            |                                              |                                                  | MALTOSE EXCESS 1 |                                                                                                                                                           |
| SWEET1          | <b>SWEET sugar transporters</b>              | Sugars Will Eventually be Exported Transporter1  | AT1G21460        | Chen et al. 2010                                                                                                                                          |
| SWEET2          |                                              | Sugars Will Eventually be Exported Transporter2  | AT3G14770        |                                                                                                                                                           |
| SWEET3          |                                              | Sugars Will Eventually be Exported Transporter3  | AT5G53190        |                                                                                                                                                           |
| SWEET4          |                                              | Sugars Will Eventually be Exported Transporter4  | AT3G28007        |                                                                                                                                                           |
| SWEET5 (VEX1)   |                                              | Sugars Will Eventually be Exported Transporter5  | AT5G62850        |                                                                                                                                                           |
| SWEET6          |                                              | Sugars Will Eventually be Exported Transporter6  | AT1G66770        |                                                                                                                                                           |
| SWEET7          |                                              | Sugars Will Eventually be Exported Transporter7  | AT4G10850        |                                                                                                                                                           |
| SWEET8 (RPG1)   |                                              | Sugars Will Eventually be Exported Transporter8  | AT5G40260        |                                                                                                                                                           |
| SWEET9          |                                              | Sugars Will Eventually be Exported Transporter9  | AT2G39060        |                                                                                                                                                           |
| SWEET10         |                                              | Sugars Will Eventually be Exported Transporter10 | AT5G50790        |                                                                                                                                                           |
| SWEET11         |                                              | Sugars Will Eventually be Exported Transporter11 | AT3G48740        |                                                                                                                                                           |
| SWEET12         |                                              | Sugars Will Eventually be Exported Transporter12 | AT5G23660        |                                                                                                                                                           |
| SWEET13 (RPG2)  |                                              | Sugars Will Eventually be Exported Transporter13 | AT5G50800        |                                                                                                                                                           |
| SWEET14         |                                              | Sugars Will Eventually be Exported Transporter14 | AT4G25010        |                                                                                                                                                           |
| SWEET15 (SAG29) |                                              | Sugars Will Eventually be Exported Transporter15 | AT5G13170        |                                                                                                                                                           |
| SWEET16         |                                              | Sugars Will Eventually be Exported Transporter16 | AT3G16690        |                                                                                                                                                           |
| SWEET17         |                                              | Sugars Will Eventually be Exported Transporter17 | AT4G15920        |                                                                                                                                                           |
| AtERDL1         | <b>Early Responsive to Dehydration6-Like</b> | Putative sugar transport protein (ERD-group)     | At1g08890        | Buettner and Sauer 2000,<br><a href="https://www.arabidopsis.org/browse/genefamily/Monos.jsp">https://www.arabidopsis.org/browse/genefamily/Monos.jsp</a> |
| AtERDL2         |                                              | Putative sugar transport protein (ERD-group)     | At1g08900        |                                                                                                                                                           |
| ESL1            |                                              | Putative sugar transport protein (ERD-group)     | At1g08920        |                                                                                                                                                           |
| AtERD6          |                                              | Putative sugar transport protein, ERD6           | At1g08930        |                                                                                                                                                           |
| AtERDL4         |                                              | Putative sugar transport protein (ERD-group)     | At1g19450        |                                                                                                                                                           |
| AtERDL5         |                                              | Putative sugar transport protein (ERD-group)     | At1g54730        |                                                                                                                                                           |
| AtERDL6         |                                              | Proton-driven vacuolar glucose exporter          | At1g75220        |                                                                                                                                                           |
| AtERDL7         |                                              | Putative sugar transport protein (ERD-group)     | At2g48020        |                                                                                                                                                           |
| AtERDL8         |                                              | Putative sugar transport protein (ERD-group)     | At3g05150        |                                                                                                                                                           |
| AtERDL9         |                                              | Putative sugar transport protein (ERD-group)     | At3g05160        |                                                                                                                                                           |
| AtERDL10        |                                              | Putative sugar transport protein (ERD-group)     | At3g05165        |                                                                                                                                                           |
| AtERDL11        |                                              | Putative sugar transport protein (ERD-group)     | At3g05400        |                                                                                                                                                           |
| AtERDL12        |                                              | Putative sugar transport protein (ERD-group)     | At3g20460        |                                                                                                                                                           |
| AtERDL13        |                                              | Putative sugar transport protein (ERD-group)     | At4g04750        |                                                                                                                                                           |
| AtERDL14        |                                              | Putative sugar transport protein (ERD-group)     | At4g04760        |                                                                                                                                                           |
| AtERDL15        |                                              | Putative sugar transport protein (ERD-group)     | At3g05155        |                                                                                                                                                           |
| AtERDL16        |                                              | Putative sugar transport protein (ERD-group)     | At5g18840        |                                                                                                                                                           |
| AtSFP1          |                                              | Putative sugar transport protein (ERD-group)     | At5g27350        |                                                                                                                                                           |
| AtSFP2          |                                              | Putative sugar transport protein (ERD-group)     | At5g27360        |                                                                                                                                                           |

## B- Starch and hexose phosphate metabolism genes

| Gene name                  | Group                          | Enzyme                          | Locus                               | References            |           |  |
|----------------------------|--------------------------------|---------------------------------|-------------------------------------|-----------------------|-----------|--|
| <b>PGII (PGI)</b>          | <b>Starch biosynthesis</b>     | Phosphoglucoisomerase           | At4g24620                           | Streb and Zeeman 2012 |           |  |
| <b>PGMI (PGM)</b>          |                                | Phosphoglucomutase              | At5g51820                           |                       |           |  |
| <b>APSI (ADG1)</b>         |                                | AGPase small subunit 1          | At5g48300                           |                       |           |  |
| <b>APS2</b>                |                                | AGPase small subunit-like 2     | At1g05610                           |                       |           |  |
| <b>APL1 (ADG2)</b>         |                                | AGPase large subunit 1          | At5g19220                           |                       |           |  |
| <b>APL2</b>                |                                | AGPase large subunit 2          | At1g27680                           |                       |           |  |
| <b>APL3</b>                |                                | AGPase large subunit 3          | At4g39210                           |                       |           |  |
| <b>APL4</b>                |                                | AGPase large subunit 4          | At2g21590                           |                       |           |  |
| <b>GBS1</b>                |                                | Granule-bound starch synthase 1 | At1g32900                           |                       |           |  |
| <b>SS1</b>                 |                                | Soluble starch synthase 1       | At5g24300                           |                       |           |  |
| <b>SS2</b>                 |                                | Soluble starch synthase 2       | At3g01180                           |                       |           |  |
| <b>SS3</b>                 |                                | Soluble starch synthase 3       | At1g11720                           |                       |           |  |
| <b>SS4</b>                 |                                | Soluble starch synthase 4       | At4g18240                           |                       |           |  |
| <b>BE1</b>                 |                                | Starch branching enzyme 1       | At3g20440                           |                       |           |  |
| <b>BE2</b>                 |                                | Starch branching enzyme 2       | At5g03650                           |                       |           |  |
| <b>BE3</b>                 |                                | Starch branching enzyme 3       | At2g36390                           |                       |           |  |
| <b>ISA1</b>                |                                | Isoamylase 1                    | At2g39930                           |                       |           |  |
| <b>ISA2</b>                |                                | Isoamylase 2                    | At1g03310                           |                       |           |  |
| <b>GWD1 (SEX1)</b>         |                                | <b>Starch Breakdown</b>         | Glucan, water dikinase 1            |                       | At1g10760 |  |
| <b>GWD2</b>                |                                |                                 | Glucan, water dikinase 2            |                       | At4g24450 |  |
| <b>PWD (GWD3)</b>          | Phosphoglucan, water dikinase  |                                 | At5g26570                           |                       |           |  |
| <b>SEX4</b>                | Starch excess 4                |                                 | At3g52180                           |                       |           |  |
| <b>LSF2</b>                | Like Sex Four 2                |                                 | At3g10940                           |                       |           |  |
| <b>LSF1</b>                | Like Sex Four 1                |                                 | At3g01510                           |                       |           |  |
| <b>BAM1 (BMY7 /TR-BYM)</b> | beta-Amylase 1                 |                                 | At3g23920                           |                       |           |  |
| <b>BAM2 (BMY9)</b>         | beta-Amylase 2                 |                                 | At4g00490                           |                       |           |  |
| <b>BAM3 (BMY8)</b>         | beta-Amylase 3                 |                                 | At4g17090                           |                       |           |  |
| <b>BAM4</b>                | beta-Amylase 4                 |                                 | At5g55700                           |                       |           |  |
| <b>BAM5 (BMY1 /RAM1)</b>   | beta-Amylase 5                 |                                 | At4g15210                           |                       |           |  |
| <b>BAM6</b>                | beta-Amylase 6                 |                                 | At2g32290                           |                       |           |  |
| <b>BAM7</b>                | beta-Amylase 7                 |                                 | At2g45880                           |                       |           |  |
| <b>BAM8</b>                | beta-Amylase 8                 |                                 | At5g45300                           |                       |           |  |
| <b>BAM9 (BMY3)</b>         | beta-Amylase 9                 |                                 | At5g18670                           |                       |           |  |
| <b>AMY1</b>                | alpha-Amylase 1                |                                 | At4g25000                           |                       |           |  |
| <b>AMY2</b>                | alpha-Amylase 2                |                                 | At1g76130                           |                       |           |  |
| <b>AMY3</b>                | alpha-Amylase 3                |                                 | At1g69830                           |                       |           |  |
| <b>ISA3</b>                | Isoamylase 3                   |                                 | At4g09020                           |                       |           |  |
| <b>LDA (PU1)</b>           | Limit dextrinase               |                                 | At5g04360                           |                       |           |  |
| <b>PHS1</b>                | Glucan phosphorylase           | At3g29320                       |                                     |                       |           |  |
| <b>PHS2</b>                | Glucan phosphorylase           | At3g46970                       |                                     |                       |           |  |
| <b>DPE1</b>                | Disproportionating enzyme      | At5g64860                       |                                     |                       |           |  |
| <b>DPE2</b>                | Maltose transglucosidase       | At2g40840                       |                                     |                       |           |  |
| <b>PGIC</b>                | Phosphoglucoisomerase          | At5g42740                       | Arabidopsis.org                     |                       |           |  |
| <b>PGM2</b>                | Phosphoglucomutase2            | At170730                        | Egli et al 2010                     |                       |           |  |
| <b>PGM3</b>                | Phosphoglucomutase3            | At1g23190                       |                                     |                       |           |  |
| <b>PGML1</b>               | Phosphoglucomutase-like1       | At1g70820                       |                                     |                       |           |  |
| <b>PGML2</b>               | Phosphoglucomutase-like2       | At4g11570                       | Karve et al 2008, Moore et al. 2003 |                       |           |  |
| <b>PGML3</b>               | Phosphoglucomutase-like3       | At5g17530                       |                                     |                       |           |  |
| <b>HXK1</b>                | Hexokinase1                    | At4g29130                       |                                     |                       |           |  |
| <b>HXK2</b>                | Hexokinase2                    | At2g19860                       | Park et al 2010                     |                       |           |  |
| <b>HXK3</b>                | Hexokinase3                    | At1g47840                       |                                     |                       |           |  |
| <b>HKL1</b>                | Hexokinase-like1               | At1g50460                       |                                     |                       |           |  |
| <b>HKL2</b>                | Hexokinase-like2               | At3g20040                       |                                     |                       |           |  |
| <b>HKL3</b>                | Hexokinase-like3               | At4g37840                       |                                     |                       |           |  |
| <b>AtUGP1</b>              | UDP-glucose pyrophosphorylase1 | At3g03250                       | Park et al 2010                     |                       |           |  |
| <b>AtUGP2</b>              | UDP-glucose pyrophosphorylase2 | At5g17310                       |                                     |                       |           |  |

|               | Cytoplasmic hexose-phosphate metabolism        |                                                         |           |                         |
|---------------|------------------------------------------------|---------------------------------------------------------|-----------|-------------------------|
| AtTPS1        |                                                | T6P Synthase                                            | At1g78580 |                         |
| AtTPS2        |                                                |                                                         | At1g16980 |                         |
| AtTPS3        |                                                |                                                         | At1g17000 |                         |
| AtTPS4        |                                                |                                                         | At4g27550 |                         |
| AtTPS5        |                                                |                                                         | At4g17770 |                         |
| AtTPS6        |                                                | T6P Synthase                                            | At1g68020 | Vandesteene et al 2010  |
| AtTPS7        |                                                |                                                         | At1g06410 |                         |
| AtTPS8        |                                                |                                                         | At1g70290 |                         |
| AtTPS9        |                                                |                                                         | At1g23870 |                         |
| AtTPS10       |                                                |                                                         | At1g60140 |                         |
| AtTPS11       |                                                |                                                         | At2g18700 |                         |
| AtTPPA        |                                                |                                                         | At5g51460 |                         |
| AtTPPB        |                                                | T6P Phosphatase                                         | At1g78090 |                         |
| AtTPPC        |                                                |                                                         | At1g22210 |                         |
| AtTPPD        |                                                |                                                         | At1g35910 |                         |
| AtTPPE        |                                                |                                                         | At2g22190 |                         |
| AtTPPF        |                                                |                                                         | At4g12430 |                         |
| AtTPPG        |                                                |                                                         | At4g22590 |                         |
| AtTPPH        |                                                |                                                         | At4g39770 |                         |
| AtTPPI        |                                                |                                                         | At5g10100 |                         |
| AtTPPJ        |                                                |                                                         | At5g65140 |                         |
| AtTRE1        |                                                | Trehalase                                               | At4g24040 |                         |
| AtGPT1        |                                                | 6-phosphate/phosphate translocator1                     | At5g54800 | Niewiadomski et al 2005 |
| AtGPT2        |                                                | 6-phosphate/phosphate translocator2                     | At1g61800 |                         |
| AtGPT2-like   | Plastidic translocators and translocator-likes | glucose 6 phosphate/phosphate translocator-like protein | At5g17630 | Ward 2001               |
| TPT (TPT1)    |                                                | phosphate/triose-phosphate translocator precursor       | At5g46110 |                         |
| Transloc_Fam  |                                                | Hypothetical protein                                    | At4g04300 |                         |
| Transloc_Fam1 |                                                | Putative protein                                        | At5g28230 |                         |
| PPT1          |                                                | phosphate/phosphoenolpyruvate translocator precursor    | At5g33320 |                         |
| PPT2          |                                                | putative phosphate/phosphoenolpyruvate translocator     | At3g01550 |                         |

### C- Arrays used in this work

| Array set     | Sample     | Description                      | Accession number | Reference            |
|---------------|------------|----------------------------------|------------------|----------------------|
| Flower stages | ATGE_31_A2 | flowers at floral stage 9        | ATMX-9           | Schmid et al., 2005  |
|               | ATGE_31_B2 | flowers at floral stage 9        | ATMX-9           | Schmid et al., 2005  |
|               | ATGE_31_C2 | flowers at floral stage 9        | ATMX-9           | Schmid et al., 2005  |
|               | ATGE_32_A2 | flowers at floral stage 10 to 11 | ATMX-9           | Schmid et al., 2005  |
|               | ATGE_32_B2 | flowers at floral stage 10 to 11 | ATMX-9           | Schmid et al., 2005  |
|               | ATGE_32_C2 | flowers at floral stage 10 to 11 | ATMX-9           | Schmid et al., 2005  |
|               | ATGE_33_A  | flowers at floral stage 13       | ATMX-9           | Schmid et al., 2005  |
|               | ATGE_33_B  | flowers at floral stage 13       | ATMX-9           | Schmid et al., 2005  |
|               | ATGE_33_C  | flowers at floral stage 13       | ATMX-9           | Schmid et al., 2005  |
|               | ATGE_39_A  | flowers at floral stage 16       | ATMX-9           | Schmid et al., 2005  |
|               | ATGE_39_B  | flowers at floral stage 16       | ATMX-9           | Schmid et al., 2005  |
|               | ATGE_39_C  | flowers at floral stage 16       | ATMX-9           | Schmid et al., 2005  |
|               | GSM674593  | pistil before pollination        | GSE27281         | Boavida et al., 2011 |
|               | GSM674594  | pistil before pollination        | GSE27281         | Boavida et al., 2011 |
|               | GSM674587  | pistil 30 min after pollination  | GSE27281         | Boavida et al., 2011 |
|               | GSM674588  | pistil 30 min after pollination  | GSE27281         | Boavida et al., 2011 |
|               | GSM674589  | pistil 210 min after pollination | GSE27281         | Boavida et al., 2011 |
|               | GSM674590  | pistil 210 min after pollination | GSE27281         | Boavida et al., 2011 |
|               | GSM674591  | pistil 480 min after pollination | GSE27281         | Boavida et al., 2011 |
|               | GSM674592  | pistil 480 min after pollination | GSE27281         | Boavida et al., 2011 |
|               | ATGE_76_A  | siliques at seed stage 3         | ATMX-9           | Schmid et al., 2005  |
|               | ATGE_76_B  | siliques at seed stage 3         | ATMX-9           | Schmid et al., 2005  |
|               | ATGE_76_C  | siliques at seed stage 3         | ATMX-9           | Schmid et al., 2005  |
|               | ATGE_77_D  | siliques at seed stage 4         | ATMX-9           | Schmid et al., 2005  |
|               | ATGE_77_E  | siliques at seed stage 4         | ATMX-9           | Schmid et al., 2005  |
|               | ATGE_77_F  | siliques at seed stage 4         | ATMX-9           | Schmid et al., 2005  |
|               | ATGE_78_D  | siliques at seed stage 5         | ATMX-9           | Schmid et al., 2005  |
|               | ATGE_78_E  | siliques at seed stage 5         | ATMX-9           | Schmid et al., 2005  |
|               | ATGE_78_F  | siliques at seed stage 5         | ATMX-9           | Schmid et al., 2005  |
|               | ATGE_79_A  | seeds at stage 6                 | ATMX-9           | Schmid et al., 2005  |
|               | ATGE_79_B  | seeds at stage 6                 | ATMX-9           | Schmid et al., 2005  |
|               | ATGE_79_C  | seeds at stage 6                 | ATMX-9           | Schmid et al., 2005  |
|               | ATGE_81_A  | seeds at stage 7                 | ATMX-9           | Schmid et al., 2005  |
|               | ATGE_81_B  | seeds at stage 7                 | ATMX-9           | Schmid et al., 2005  |
|               | ATGE_81_C  | seeds at stage 7                 | ATMX-9           | Schmid et al., 2005  |
|               | ATGE_82_A  | seeds at stage 8                 | ATMX-9           | Schmid et al., 2005  |
|               | ATGE_82_B  | seeds at stage 8                 | ATMX-9           | Schmid et al., 2005  |
|               | ATGE_82_C  | seeds at stage 8                 | ATMX-9           | Schmid et al., 2005  |

|                       |                                   |                                          |             |                       |
|-----------------------|-----------------------------------|------------------------------------------|-------------|-----------------------|
|                       | ATGE_83_A                         | seeds at stage 9                         | ATMX-9      | Schmid et al., 2005   |
|                       | ATGE_83_B                         | seeds at stage 9                         | ATMX-9      | Schmid et al., 2005   |
|                       | ATGE_83_C                         | seeds at stage 9                         | ATMX-9      | Schmid et al., 2005   |
|                       | ATGE_84_A                         | seeds at stage 10                        | ATMX-9      | Schmid et al., 2005   |
|                       | ATGE_84_B                         | seeds at stage 10                        | ATMX-9      | Schmid et al., 2005   |
|                       | ATGE_84_D                         | seeds at stage 10                        | ATMX-9      | Schmid et al., 2005   |
| <b>Floral organs</b>  | ATGE_36_A                         | stamens at floral stage 12               | ATMX-9      | Schmid et al., 2005   |
|                       | ATGE_36_B                         | stamens at floral stage 12               | ATMX-9      | Schmid et al., 2005   |
|                       | ATGE_36_C                         | stamens at floral stage 12               | ATMX-9      | Schmid et al., 2005   |
|                       | ATGE_43_A                         | stamens at floral stage 15               | ATMX-9      | Schmid et al., 2005   |
|                       | ATGE_43_B                         | stamens at floral stage 15               | ATMX-9      | Schmid et al., 2005   |
|                       | ATGE_43_C                         | stamens at floral stage 15               | ATMX-9      | Schmid et al., 2005   |
|                       | ATGE_37_A                         | carpels at floral stage 12               | ATMX-9      | Schmid et al., 2005   |
|                       | ATGE_37_B                         | carpels at floral stage 12               | ATMX-9      | Schmid et al., 2005   |
|                       | ATGE_37_C                         | carpels at floral stage 12               | ATMX-9      | Schmid et al., 2005   |
|                       | ATGE_45_A                         | carpels at floral stage 15               | ATMX-9      | Schmid et al., 2005   |
|                       | ATGE_45_B                         | carpels at floral stage 15               | ATMX-9      | Schmid et al., 2005   |
|                       | ATGE_45_C                         | carpels at floral stage 15               | ATMX-9      | Schmid et al., 2005   |
|                       | GSM390164                         | lateral nectary at floral stage 11 to 12 | GSE15601    | Kram et al., 2009     |
|                       | GSM390165                         | lateral nectary at floral stage 11 to 12 | GSE15601    | Kram et al., 2009     |
|                       | GSM390166                         | lateral nectary at floral stage 11 to 12 | GSE15601    | Kram et al., 2009     |
|                       | GSM390161                         | lateral nectary at floral stage 14 to 15 | GSE15601    | Kram et al., 2009     |
|                       | GSM390162                         | lateral nectary at floral stage 14 to 15 | GSE15601    | Kram et al., 2009     |
|                       | GSM390163                         | lateral nectary at floral stage 14 to 15 | GSE15601    | Kram et al., 2009     |
|                       | GSM390167                         | median nectary at floral stage 14 to 15  | GSE15601    | Kram et al., 2009     |
|                       | GSM390168                         | median nectary at floral stage 14 to 15  | GSE15601    | Kram et al., 2009     |
|                       | ATGE_40_A                         | pedicels at floral stage 15              | ATMX-9      | Schmid et al., 2005   |
|                       | ATGE_40_B                         | pedicels at floral stage 15              | ATMX-9      | Schmid et al., 2005   |
|                       | ATGE_40_C                         | pedicels at floral stage 15              | ATMX-9      | Schmid et al., 2005   |
| <b>Pollen stages</b>  | GSM142734                         | pollen unicellular                       | GSE6162     | Honys et al., 2004    |
|                       | GSM142737                         | pollen unicellular                       | GSE6162     | Honys et al., 2004    |
|                       | GSM142735                         | pollen bicellular                        | GSE6162     | Honys et al., 2004    |
|                       | GSM142738                         | pollen bicellular                        | GSE6162     | Honys et al., 2004    |
|                       | GSM142736                         | pollen tricellular                       | GSE6162     | Honys et al., 2004    |
|                       | GSM142739                         | pollen tricellular                       | GSE6162     | Honys et al., 2004    |
|                       | GSM142740                         | pollen mature                            | GSE6162     | Honys et al., 2004    |
|                       | At_pollenGrain_J8_ATH1_IGC1_J     | pollen mature                            | E-MEXP-285  | Pina et al., 2005     |
|                       | At_pollenGrain_J9_new_ATH1_IGC1_J | pollen mature                            | E-MEXP-285  | Pina et al., 2005     |
|                       | At_Pollen_Rep1_ATH1_IGC_FB        | pollen mature                            | E-ATMX-35   | Borges et al. 2008    |
|                       | At_Pollen_Rep2_ATH1_IGC_FB        | pollen mature                            | E-ATMX-35   | Borges et al. 2008    |
|                       | At_Pollen_Rep3_ATH1_IGC_FB        | pollen mature                            | E-ATMX-35   | Borges et al. 2008    |
|                       | ATGE_73_A                         | pollen mature                            | ATMX-9      | Schmid et al. 2005    |
|                       | ATGE_73_B                         | pollen mature                            | ATMX-9      | Schmid et al. 2005    |
|                       | ATGE_73_C                         | pollen mature                            | ATMX-9      | Schmid et al. 2005    |
|                       | GSM154503                         | pollen mature                            | GSE6696     | Wang et al., 2008     |
|                       | GSM154504                         | pollen mature                            | GSE6696     | Wang et al., 2008     |
|                       | GSM433634                         | pollen mature                            | GSE17343    | Qin et al., 2009      |
|                       | GSM433635                         | pollen mature                            | GSE17343    | Qin et al., 2009      |
|                       | GSM433636                         | pollen mature                            | GSE17343    | Qin et al., 2009      |
|                       | GSM433637                         | pollen mature                            | GSE17343    | Qin et al., 2009      |
|                       | GSM154505                         | pollen hydrated                          | GSE6696     | Wang et al., 2008     |
|                       | GSM154506                         | pollen hydrated                          | GSE6696     | Wang et al., 2008     |
|                       | GSM433638                         | pollen tube growing for 30 min           | GSE17343    | Qin et al., 2009      |
|                       | GSM433639                         | pollen tube growing for 30 min           | GSE17343    | Qin et al., 2009      |
|                       | GSM433640                         | pollen tube growing for 30 min           | GSE17343    | Qin et al., 2009      |
|                       | GSM433641                         | pollen tube growing for 30 min           | GSE17343    | Qin et al., 2009      |
|                       | GSM433642                         | pollen tube growing for 240 min          | GSE17343    | Qin et al., 2009      |
|                       | GSM433643                         | pollen tube growing for 240 min          | GSE17343    | Qin et al., 2009      |
|                       | GSM433644                         | pollen tube growing for 240 min          | GSE17343    | Qin et al., 2009      |
|                       | GSM433645                         | pollen tube growing for 240 min          | GSE17343    | Qin et al., 2009      |
| <b>Germline cells</b> | Egg1                              | egg cell                                 | E-MEXP-2227 | Wuest et al., 2010    |
|                       | Egg4                              | egg cell                                 | E-MEXP-2227 | Wuest et al., 2010    |
|                       | Egg5                              | egg cell                                 | E-MEXP-2227 | Wuest et al., 2010    |
|                       | Cen1                              | central cell                             | E-MEXP-2227 | Wuest et al., 2010    |
|                       | Cen2                              | central cell                             | E-MEXP-2227 | Wuest et al., 2010    |
|                       | Cen3                              | central cell                             | E-MEXP-2227 | Wuest et al., 2010    |
|                       | Syn1                              | synergids                                | E-MEXP-2227 | Wuest et al., 2010    |
|                       | Syn2                              | synergids                                | E-MEXP-2227 | Wuest et al., 2010    |
|                       | Syn3                              | synergids                                | E-MEXP-2227 | Wuest et al., 2010    |
|                       | MMC1                              | megaspore mother cell                    | E-MEXP-3137 | Schmidt et al., 2011  |
|                       | MMC2                              | megaspore mother cell                    | E-MEXP-3137 | Schmidt et al., 2011  |
|                       | MMC3                              | megaspore mother cell                    | E-MEXP-3137 | Schmidt et al., 2011  |
|                       | MMC4                              | megaspore mother cell                    | E-MEXP-3137 | Schmidt et al., 2011  |
|                       | At_Sperm_Rep1_ATH1_IGC_FB         | sperms                                   | E-ATMX-35   | Borges et al., 2008   |
|                       | At_Sperm_Rep2_ATH1_IGC_FB         | sperms                                   | E-ATMX-35   | Borges et al., 2008   |
|                       | At_Sperm_Rep3_ATH1_IGC_FB         | sperms                                   | E-ATMX-35   | Borges et al., 2008   |
| <b>Seed stages</b>    | EarlyHE1ATH1                      | ovule with developing gametophyte        | unknown     | Yu et al., 2005       |
|                       | EarlyHE2ATH1                      | ovule with developing gametophyte        | unknown     | Yu et al., 2005       |
|                       | EarlyHE3ATH1                      | ovule with developing gametophyte        | unknown     | Yu et al., 2005       |
|                       | GSM674595                         | ovule with mature gametophyte            | GSE27281    | Boavida et al., 2011  |
|                       | GSM674596                         | ovule with mature gametophyte            | GSE27281    | Boavida et al., 2011  |
|                       | GSM284386                         | suspensor at globular embryo stage       | GSE12404    | Belmonte et al., 2013 |
|                       | GSM284387                         | suspensor at globular embryo stage       | GSE12404    | Belmonte et al., 2013 |
|                       | GSM311273                         | embryo at pre-globular stage             | GSE12404    | Belmonte et al., 2013 |
|                       | GSM311274                         | embryo at pre-globular stage             | GSE12404    | Belmonte et al., 2013 |
|                       | GSM284384                         | embryo at globular stage                 | GSE12404    | Belmonte et al., 2013 |
|                       | GSM284385                         | embryo at globular stage                 | GSE12404    | Belmonte et al., 2013 |
|                       | GSM378645                         | embryo at heart stage                    | GSE12404    | Belmonte et al., 2013 |
|                       | GSM378646                         | embryo at heart stage                    | GSE12404    | Belmonte et al., 2013 |
|                       | GSM311287                         | embryo at linear cotyledon stage         | GSE12404    | Belmonte et al., 2013 |
|                       | GSM311288                         | embryo at linear cotyledon stage         | GSE12404    | Belmonte et al., 2013 |

|           |                                                         |          |                       |
|-----------|---------------------------------------------------------|----------|-----------------------|
| GSM378733 | embryo at bending cotyledon stage                       | GSE12404 | Belmonte et al., 2013 |
| GSM378734 | embryo at bending cotyledon stage                       | GSE12404 | Belmonte et al., 2013 |
| GSM311275 | micropylar endosperm at pre-globular embryo stage       | GSE12404 | Belmonte et al., 2013 |
| GSM311276 | micropylar endosperm at pre-globular embryo stage       | GSE12404 | Belmonte et al., 2013 |
| GSM284388 | micropylar endosperm at globular embryo stage           | GSE12404 | Belmonte et al., 2013 |
| GSM284389 | micropylar endosperm at globular embryo stage           | GSE12404 | Belmonte et al., 2013 |
| GSM378647 | micropylar endosperm at heart embryo stage              | GSE12404 | Belmonte et al., 2013 |
| GSM378648 | micropylar endosperm at heart embryo stage              | GSE12404 | Belmonte et al., 2013 |
| GSM499420 | micropylar endosperm at linear cotyledon embryo stage   | GSE12404 | Belmonte et al., 2013 |
| GSM499421 | micropylar endosperm at linear cotyledon embryo stage   | GSE12404 | Belmonte et al., 2013 |
| GSM378735 | micropylar endosperm at bent cotyledon embryo stage     | GSE12404 | Belmonte et al., 2013 |
| GSM378736 | micropylar endosperm at bent cotyledon embryo stage     | GSE12404 | Belmonte et al., 2013 |
| GSM311277 | peripheral endosperm at pre-globular embryo stage       | GSE12404 | Belmonte et al., 2013 |
| GSM311278 | peripheral endosperm at pre-globular embryo stage       | GSE12404 | Belmonte et al., 2013 |
| GSM284390 | peripheral endosperm at globular embryo stage           | GSE12404 | Belmonte et al., 2013 |
| GSM284391 | peripheral endosperm at globular embryo stage           | GSE12404 | Belmonte et al., 2013 |
| GSM378649 | peripheral endosperm at heart embryo stage              | GSE12404 | Belmonte et al., 2013 |
| GSM378650 | peripheral endosperm at heart embryo stage              | GSE12404 | Belmonte et al., 2013 |
| GSM311289 | cellularized endosperm at linear cotyledon embryo stage | GSE12404 | Belmonte et al., 2013 |
| GSM311290 | cellularized endosperm at linear cotyledon embryo stage | GSE12404 | Belmonte et al., 2013 |
| GSM378737 | peripheral endosperm at bent cotyledon embryo stage     | GSE12404 | Belmonte et al., 2013 |
| GSM378738 | peripheral endosperm at bent cotyledon embryo stage     | GSE12404 | Belmonte et al., 2013 |
| GSM311279 | chalazal endosperm at pre-globular embryo stage         | GSE12404 | Belmonte et al., 2013 |
| GSM311280 | chalazal endosperm at pre-globular embryo stage         | GSE12404 | Belmonte et al., 2013 |
| GSM284392 | chalazal endosperm at globular embryo stage             | GSE12404 | Belmonte et al., 2013 |
| GSM284393 | chalazal endosperm at globular embryo stage             | GSE12404 | Belmonte et al., 2013 |
| GSM284394 | chalazal endosperm at globular embryo stage             | GSE12404 | Belmonte et al., 2013 |
| GSM378651 | chalazal endosperm at heart embryo stage                | GSE12404 | Belmonte et al., 2013 |
| GSM378652 | chalazal endosperm at heart embryo stage                | GSE12404 | Belmonte et al., 2013 |
| GSM378653 | chalazal endosperm at heart embryo stage                | GSE12404 | Belmonte et al., 2013 |
| GSM311291 | chalazal endosperm at linear cotyledon embryo stage     | GSE12404 | Belmonte et al., 2013 |
| GSM311292 | chalazal endosperm at linear cotyledon embryo stage     | GSE12404 | Belmonte et al., 2013 |
| GSM378739 | chalazal endosperm at bent cotyledon embryo stage       | GSE12404 | Belmonte et al., 2013 |
| GSM378740 | chalazal endosperm at bent cotyledon embryo stage       | GSE12404 | Belmonte et al., 2013 |
| GSM311281 | chalazal seed coat at pre-globular embryo stage         | GSE12404 | Belmonte et al., 2013 |
| GSM311282 | chalazal seed coat at pre-globular embryo stage         | GSE12404 | Belmonte et al., 2013 |
| GSM284395 | chalazal seed coat at globular embryo stage             | GSE12404 | Belmonte et al., 2013 |
| GSM284396 | chalazal seed coat at globular embryo stage             | GSE12404 | Belmonte et al., 2013 |
| GSM378654 | chalazal seed coat at heart embryo stage                | GSE12404 | Belmonte et al., 2013 |
| GSM378655 | chalazal seed coat at heart embryo stage                | GSE12404 | Belmonte et al., 2013 |
| GSM378656 | chalazal seed coat at heart embryo stage                | GSE12404 | Belmonte et al., 2013 |
| GSM311293 | chalazal seed coat at linear cotyledon embryo stage     | GSE12404 | Belmonte et al., 2013 |
| GSM311294 | chalazal seed coat at linear cotyledon embryo stage     | GSE12404 | Belmonte et al., 2013 |
| GSM378741 | chalazal seed coat at bent cotyledon embryo stage       | GSE12404 | Belmonte et al., 2013 |
| GSM378742 | chalazal seed coat at bent cotyledon embryo stage       | GSE12404 | Belmonte et al., 2013 |
| GSM311283 | seed coat at pre-globular embryo stage                  | GSE12404 | Belmonte et al., 2013 |
| GSM311284 | seed coat at pre-globular embryo stage                  | GSE12404 | Belmonte et al., 2013 |
| GSM284397 | seed coat at globular embryo stage                      | GSE12404 | Belmonte et al., 2013 |
| GSM284398 | seed coat at globular embryo stage                      | GSE12404 | Belmonte et al., 2013 |
| GSM378657 | seed coat at heart embryo stage                         | GSE12404 | Belmonte et al., 2013 |
| GSM378658 | seed coat at heart embryo stage                         | GSE12404 | Belmonte et al., 2013 |
| GSM311295 | seed coat at linear cotyledon embryo stage              | GSE12404 | Belmonte et al., 2013 |
| GSM311296 | seed coat at linear cotyledon embryo stage              | GSE12404 | Belmonte et al., 2013 |
| GSM378743 | seed coat at bent cotyledon embryo stage                | GSE12404 | Belmonte et al., 2013 |
| GSM378744 | seed coat at bent cotyledon embryo stage                | GSE12404 | Belmonte et al., 2013 |
| GSM311285 | seeds at pre-globular embryo stage                      | GSE12404 | Belmonte et al., 2013 |
| GSM311286 | seeds at pre-globular embryo stage                      | GSE12404 | Belmonte et al., 2013 |
| GSM378659 | seeds at heart embryo stage                             | GSE12404 | Belmonte et al., 2013 |
| GSM378660 | seeds at heart embryo stage                             | GSE12404 | Belmonte et al., 2013 |
| GSM499418 | seeds at linear cotyledon embryo stage                  | GSE12404 | Belmonte et al., 2013 |
| GSM499419 | seeds at linear cotyledon embryo stage                  | GSE12404 | Belmonte et al., 2013 |
| GSM378745 | seeds at bent cotyledon embryo stage                    | GSE12404 | Belmonte et al., 2013 |
| GSM378746 | seeds at bent cotyledon embryo stage                    | GSE12404 | Belmonte et al., 2013 |

#### D- Primers used in this study

| Primer name | Gene      | Primer sequence                       | Used for      |
|-------------|-----------|---------------------------------------|---------------|
| GPT1-F      | At5g54800 | 5'-TTGACATACTCACCGTTGACAG-3'          | genotyping    |
| GPT1-R      |           | 5'-TCTCTCCCAGTATATACGCGC-3'           | genotyping    |
| GPT1-F      | At5g54800 | 5'-GGCTGTTGGGATCGTTGAGA-3'            | RT-PCR, ddPCR |
| GPT1-R      |           | 5'-GCCACAGCAACCGGAAAAAG-3'            | RT-PCR, ddPCR |
| pgi1-F      | At4g24620 | 5'-TCGAGAACACACTTGATTCTAT-3'          | genotyping    |
| pgi1-R      |           | 5'-GCCAGCTCTGGCCCAA-3'                | genotyping    |
| pgm1-F      | At5g51820 | 5'-AGGCTTCCGAGCAACTCAATATC-3'         | genotyping    |
| pgm1-R      |           | 5'-CTGACCACTGCTGAATTGAAC-3'           | genotyping    |
| IPP2-F      | At3g02780 | 5'-GTATGAGTTGCTTCTCCAGCAAAG-3'        | RT-PCR, ddPCR |
| IPP2-R      |           | 5'-GAGGATGGCTGCAACAAGTGT-3'           | RT-PCR, ddPCR |
| Act2-F      | At3g18780 | 5'-CTT GCA CCA AGC AGC ATG AA-3'      | RT-PCR, ddPCR |
| Act2-R      |           | 5'-CCG ATC CAG ACA CTG TAC TTC CTT-3' | RT-PCR, ddPCR |
| UBC9-F      | At4g27960 | 5'-TCA CAA TTT CCA AGG TGC TGC-3'     | RT-PCR, ddPCR |
| UBC9-R      |           | 5'-TCA TCT GGG TTT GGA TCC GT-3'      | RT-PCR, ddPCR |
| UBC21-F     | At5g25760 | 5'-ATG CTT GGA GTC CTG CTT GG-3'      | RT-PCR        |
| UBC21-R     |           | 5'-TGC CAT TGA ATT GAA CCC TCT C-3'   | RT-PCR        |
| PP2A-F      | At1g13320 | 5'-TAA CGT GGC CAA AAT GAT GC-3'      | RT-PCR, ddPCR |
| PP2A-R      |           | 5'-GTT CTC CAC AAC CGC TTG GT-3'      | RT-PCR, ddPCR |

#### E- Literature cited

- Belmonte MF, Kirkbride RC, Stone SL, Pelletier JM, Bui AQ, Yeung EC, Hashimoto M, Fei J, Harada CM, Munoz MD, et al (2013) Comprehensive developmental profiles of gene activity in regions and subregions of the Arabidopsis seed. *Proc Natl Acad Sci USA* 110: E435–E444
- Boavida LC, Borges F, Becker JD, Feijó JA (2011) Whole genome analysis of gene expression reveals coordinated activation of signaling and metabolic pathways during pollen-pistil interactions in Arabidopsis. *Plant Physiol* 155: 2066–2080
- Borges F, Gomes G, Gardner R, Moreno N, McCormick S, Feijó JA, Becker JD (2008) Comparative transcriptomics of Arabidopsis sperm cells. *Plant Physiol* 148: 1168–1181
- Büttner M, Sauer N (2000) Monosaccharide transporters in plants: structure, function and physiology. *Biochim Biophys Acta* 1465: 263–274
- Chen L-Q, Hou B-H, Lalonde S, Takanaga H, Hartung ML, Qu X-Q, Guo W-J, Kim J-G, Underwood W, Chaudhuri B, et al (2010) Sugar transporters for intercellular exchange and nutrition of pathogens. *Nature* 468: 527–532
- Egli B, Kolling K, Kohler C, Zeeman SC, Streb S (2010) Loss of cytosolic phosphoglucomutase compromises gametophyte development in Arabidopsis. *Plant Physiol* 154: 1659–1671
- Fallahi H, Scofield GN, Badger MR, Chow WS, Furbank RT, Ruan Y-L (2008) Localization of sucrose synthase in developing seed and siliques of Arabidopsis thaliana reveals diverse roles for SUS during development. *J Exp Bot* 59: 3283–3295
- Honys D, Twell D (2004) Transcriptome analysis of haploid male gametophyte development in Arabidopsis. *Genome Biol* 5: R85
- Karve A, Rauh BL, Xia X, Kandasamy M, Meagher RB, Sheen J, Moore BD (2008) Expression and evolutionary features of the hexokinase gene family in Arabidopsis. *Planta* 228: 411–425
- Kram BW, Xu WW, Carter CJ (2009) Uncovering the Arabidopsis thaliana nectary transcriptome: investigation of differential gene expression in floral nectariferous tissues. *BMC Plant Biol* 9: 92
- Lunn JE, MacRae E (2003) New complexities in the synthesis of sucrose. *Curr Opin Plant Biol* 6: 208–214
- Lutfiyya LL, Xu N, D'Ordine RL, Morrell JA, Miller PW, Duff SMG (2007) Phylogenetic and expression analysis of sucrose phosphate synthase isozymes in plants. *J Plant Physiol* 164: 923–933
- Moore B, Zhou L, Rolland F, Hall Q, Cheng W-H, Liu Y-X, Hwang I, Jones T, Sheen J (2003) Role of the Arabidopsis glucose sensor HXK1 in nutrient, light, and hormonal signaling. *Science* 300: 332–336
- Niewiadomski P (2005) The Arabidopsis plastidic glucose 6-phosphate/phosphate translocator GPT1 is essential for pollen maturation and embryo sac development. *Plant Cell* 17: 760–775
- Park JI, Ishimizu T, Suwabe K, Sudo K, Masuko H, Hakozaaki H, Nou IS, Suzuki G, Watanabe M (2010) UDP-glucose pyrophosphorylase is rate limiting in vegetative and reproductive phases in Arabidopsis thaliana. *Plant Cell Physiol* 51: 981–996
- Pina P, Pinto F, Feijó JA, Becker JD (2005) Gene family analysis of the Arabidopsis pollen transcriptome reveals biological implications for cell growth, division control, and gene expression regulation. *Plant Physiol* 138: 744–756
- Qin Y, Leydon AR, Manziello A, Pandey R, Mount D, Denic S, Vasic B, Johnson MA, Palanivelu R (2009) Penetration of the stigma and style elicits a novel transcriptome in pollen tubes, pointing to genes critical for growth in a pistil. *PLoS Genet* 5: e1000621
- Schmid M, Davison TS, Henz SR, Pape UJ, Demar M, Vingron M, Schölkopf B, Weigel D, Lohmann J (2005) A gene expression map of Arabidopsis development. *Nature Genet* 37: 501–506
- Schmidt A, Wüest SE, Vijverberg K, Baroux C, Kleen D, Grossniklaus U (2011) Transcriptome analysis of the Arabidopsis megaspore mother cell uncovers the importance of RNA helicases for plant germline development. *PLoS Biol* 9: e1001155
- Sergeeva LI, Keurentjes JJB, Bentsink L, Vonk J, Van Der Plas LHW, Koornneef M, Vreugdenhil D (2006) Vacuolar invertase regulates elongation of Arabidopsis thaliana roots as revealed by QTL and mutant analysis. *Proc Natl Acad Sci USA* 103: 2994–2999
- Sherson SM, Alford HL, Forbes SM, Wallace G, Smith SM (2003) Roles of cell-wall invertases and monosaccharide transporters in the growth and development of Arabidopsis. *J Exp Bot* 54: 525–531
- Streb S, Zeeman SC (2012) Starch Metabolism in Arabidopsis. *The Arabidopsis Book* 10: e0160, doi/10.1199/tab.0160
- Vandesteene L, Ramon M, Le Roy K, Van Dijk P, Rolland F (2010) A single active trehalose-6-P synthase (TPS) and a family of putative regulatory TPS-like proteins in Arabidopsis. *Mol Plant* 3: 406–419
- Vargas WA, Pontis HG, Salerno GL (2008) New insights on sucrose metabolism: evidence for an active A/N-Inv in chloroplasts uncovers a novel component of the intracellular carbon trafficking. *Planta* 227: 795–807
- Wang Y, Zhang W-Z, Song L-F, Zou J-J, Su Z, Wu W-H (2008) Transcriptome analyses show changes in gene expression to accompany pollen germination and tube growth in Arabidopsis. *Plant Physiol* 148: 1201–1211
- Ward JM (2001) Identification of novel families of membrane proteins from the model plant Arabidopsis thaliana. *Bioinformatics* 17: 560–563
- Williams LE, Lemoine R, Sauer N (2000) Sugar transporters in higher plants - A diversity of roles and complex regulation. *Trends Plant Sci* 5: 283–290
- Wüest SE, Vijverberg K, Schmidt A, Weiss M, Gheyselinck J, Lohr M, Wellmer F, Rahnenführer J, Mering C, Grossniklaus U (2010) Arabidopsis female gametophyte gene expression map reveals similarities between plant and animal gametes. *Curr Biol* 20: 506–512
- Yu HJ, Hogan P, Sundaresan V (2005) Analysis of the female gametophyte transcriptome of Arabidopsis by comparative expression profiling. *Plant Physiol* 139: 1853–1869
